# Supplementary material
Source: PubMed Central journal article supplement (PMC4651082)
Supplement: AEM.02216-15_zam999116734so1.pdf [file AEM.02216-15_zam999116734so1.pdf]

Table 1. Meta-analytical data of the mean reduction of *E. coli* O157:H7 counts produced by washing fresh produce with sanitizing agents, along with extracted study characteristics of sanitizer concentration, washing time and temperature, type of food, and sample size N used to estimate a single log-reduction value and its standard error

| Sanitizer | Concent (%) | Time (min) | Temp (°C) | N     | Reduction (log CFU/g) | St. Error (log CFU/g) | Food        | Source |             |     |
|-----------|-------------|------------|-----------|-------|-----------------------|-----------------------|-------------|--------|-------------|-----|
| AA        | 0.01000     | 2.0        | 50        | 3     | 2.000                 | 0.115                 | babyspinach | (1)    |             |     |
|           | 0.01000     | 5.0        | 22        | 3     | 1.400                 | 0.000                 |             |        |             |     |
|           | 0.01000     | 5.0        | 40        | 3     | 1.800                 | 0.115                 |             |        |             |     |
|           | 0.02000     | 2.0        | 50        | 3     | 2.000                 | 0.115                 |             |        |             |     |
|           | 0.02000     | 5.0        | 22        | 3     | 1.500                 | 0.115                 |             |        |             |     |
|           | 0.02000     | 5.0        | 40        | 3     | 1.700                 | 0.115                 |             |        |             |     |
| ASC       | 0.01000     | 1.0        | 5         | 3     | 1.392                 | 0.080                 | cilantro    | (2)    |             |     |
|           | 0.02500     | 1.0        | 5         | 3     | 2.091                 | 0.159                 |             |        |             |     |
|           | 0.05000     | 1.0        | 5         | 3     | 2.481                 | 0.088                 |             |        |             |     |
|           | 0.10000     | 1.0        | 5         | 3     | 3.857                 | 0.199                 |             |        |             |     |
|           | 0.01000     | 1.0        | 22        | 3     | 3.800                 | 0.112                 | carrot      | (3)    |             |     |
|           | 0.01000     | 1.0        | 22        | 3     | 2.900                 | 0.064                 |             |        |             |     |
|           | 0.02500     | 1.0        | 22        | 3     | 5.100                 | 0.071                 |             |        |             |     |
|           | 0.02500     | 1.0        | 22        | 3     | 5.000                 | 0.071                 |             |        |             |     |
|           | 0.05000     | 1.0        | 22        | 3     | 5.600                 | 0.064                 |             |        |             |     |
|           | 0.05000     | 1.0        | 22        | 3     | 5.300                 | 0.071                 |             |        |             |     |
|           | 0.01000     | 1.0        | 5         | 3     | 1.470                 | 0.088                 |             |        | tatsoi      | (4) |
|           | 0.01000     | 1.5        | 5         | 3     | 1.500                 | 0.058                 |             |        |             |     |
|           | 0.01000     | 2.0        | 5         | 3     | 1.490                 | 0.072                 |             |        |             |     |
| 0.03000   | 1.0         | 5          | 3         | 1.590 | 0.083                 |                       |             |        |             |     |
| 0.03000   | 1.5         | 5          | 3         | 1.820 | 0.053                 |                       |             |        |             |     |
| 0.03000   | 2.0         | 5          | 3         | 1.930 | 0.121                 |                       |             |        |             |     |
| 0.05000   | 1.0         | 5          | 3         | 1.960 | 0.058                 |                       |             |        |             |     |
| 0.05000   | 1.5         | 5          | 3         | 1.760 | 0.088                 |                       |             |        |             |     |
| 0.05000   | 2.0         | 5          | 3         | 2.080 | 0.062                 |                       |             |        |             |     |
| Bzc       | 0.01000     | 1.0        | 22        | 6     | 0.390                 | 0.466                 | lettuce     | (5)    |             |     |
|           | 0.01000     | 1.0        | 22        | 6     | 0.390                 | 0.400                 |             |        |             |     |
|           | 0.01000     | 1.0        | 22        | 6     | 2.060                 | 0.757                 |             |        | tomato      |     |
|           | 0.01000     | 1.0        | 22        | 6     | 2.460                 | 0.731                 |             |        |             |     |
| CA        | 0.60000     | 1.0        | 5         | 3     | 0.835                 | 0.056                 | cilantro    | (2)    |             |     |
|           | 0.01000     | 2.0        | 50        | 3     | 2.200                 | 0.115                 |             |        | babyspinach | (1) |
|           | 0.01000     | 2.0        | 50        | 3     | 2.200                 | 0.058                 |             |        |             |     |
|           | 0.01000     | 5.0        | 22        | 3     | 1.500                 | 0.000                 |             |        |             |     |
|           | 0.01000     | 5.0        | 40        | 3     | 2.300                 | 0.115                 |             |        |             |     |
|           | 0.01000     | 5.0        | 22        | 3     | 1.300                 | 0.058                 |             |        |             |     |
|           | 0.01000     | 5.0        | 40        | 3     | 2.100                 | 0.115                 |             |        |             |     |
|           | 0.02000     | 2.0        | 50        | 3     | 2.100                 | 0.058                 |             |        |             |     |
|           | 0.02000     | 5.0        | 22        | 3     | 1.500                 | 0.173                 |             |        |             |     |
|           | 0.02000     | 5.0        | 40        | 3     | 2.000                 | 0.115                 |             |        |             |     |
|           | 0.01000     | 3.0        | 23        | 3     | 1.450                 | 0.361                 | spinach     | (6)    |             |     |
|           | 0.00300     | 5.0        | 20        | 6     | 0.500                 | 0.139                 | lettuce     | (7)    |             |     |

|       |         |      |    |   |       |       |          |     |
|-------|---------|------|----|---|-------|-------|----------|-----|
|       | 0.00300 | 10.0 | 20 | 6 | 0.990 | 0.237 |          |     |
|       | 0.00300 | 20.0 | 20 | 6 | 1.550 | 0.261 |          |     |
|       | 0.00300 | 30.0 | 20 | 6 | 1.890 | 0.376 |          |     |
|       | 0.00500 | 5.0  | 20 | 6 | 0.740 | 0.208 |          |     |
|       | 0.00500 | 10.0 | 20 | 6 | 1.080 | 0.204 |          |     |
|       | 0.00500 | 20.0 | 20 | 6 | 1.570 | 0.192 |          |     |
|       | 0.00500 | 30.0 | 20 | 6 | 2.050 | 0.127 |          |     |
|       | 0.00700 | 5.0  | 20 | 6 | 0.910 | 0.110 |          |     |
|       | 0.00700 | 10.0 | 20 | 6 | 1.270 | 0.118 |          |     |
|       | 0.00700 | 20.0 | 20 | 6 | 2.370 | 0.269 |          |     |
|       | 0.00700 | 30.0 | 20 | 6 | 2.560 | 0.167 |          |     |
|       | 0.01000 | 5.0  | 20 | 6 | 1.150 | 0.225 |          |     |
|       | 0.01000 | 10.0 | 20 | 6 | 1.440 | 0.135 |          |     |
|       | 0.01000 | 20.0 | 20 | 6 | 2.770 | 0.176 |          |     |
|       | 0.01000 | 30.0 | 20 | 6 | 2.910 | 0.082 |          |     |
|       | 0.02000 | 5.0  | 20 | 6 | 1.350 | 0.225 |          |     |
|       | 0.02000 | 10.0 | 20 | 6 | 1.640 | 0.024 |          |     |
|       | 0.02000 | 20.0 | 20 | 6 | 2.840 | 0.151 |          |     |
|       | 0.02000 | 30.0 | 20 | 6 | 3.070 | 0.094 |          |     |
| Ca-Oy | 0.10000 | 5.0  | 25 | 8 | 5.100 | 0.146 | tomato   | (8) |
|       | 0.10000 | 5.0  | 25 | 8 | 4.700 | 0.127 |          |     |
|       | 0.10000 | 5.0  | 25 | 8 | 1.500 | 0.112 |          |     |
|       | 0.10000 | 5.0  | 25 | 8 | 1.600 | 0.112 |          |     |
| Ca-SS | 0.10000 | 5.0  | 25 | 8 | 5.200 | 0.035 | tomato   | (8) |
|       | 0.10000 | 5.0  | 25 | 8 | 4.800 | 0.071 |          |     |
|       | 0.10000 | 5.0  | 25 | 8 | 1.700 | 0.180 |          |     |
|       | 0.10000 | 5.0  | 25 | 8 | 2.000 | 0.180 |          |     |
| CH    | 0.00500 | 0.5  | 4  | 6 | 1.900 | NR    | broccoli | (9) |
|       | 0.00500 | 2.0  | 4  | 6 | 2.080 | NR    |          |     |
|       | 0.00500 | 5.0  | 4  | 6 | 2.260 | NR    |          |     |
|       | 0.01000 | 0.5  | 4  | 6 | 1.700 | NR    |          |     |
|       | 0.01000 | 2.0  | 4  | 6 | 2.350 | NR    |          |     |
|       | 0.01000 | 2.0  | 4  | 4 | 2.340 | NR    |          |     |
|       | 0.01000 | 2.0  | 8  | 4 | 2.480 | NR    |          |     |
|       | 0.01000 | 2.0  | 15 | 4 | 2.270 | NR    |          |     |
|       | 0.01000 | 2.0  | 20 | 4 | 2.250 | NR    |          |     |
|       | 0.01000 | 2.0  | 25 | 4 | 2.260 | NR    |          |     |
|       | 0.01000 | 5.0  | 4  | 6 | 2.540 | NR    |          |     |
|       | 0.00500 | 0.5  | 4  | 8 | 2.370 | NR    | lettuce  |     |
|       | 0.00500 | 0.5  | 4  | 8 | 1.920 | NR    |          |     |
|       | 0.00500 | 2.0  | 4  | 8 | 2.360 | NR    |          |     |
|       | 0.00500 | 2.0  | 4  | 8 | 2.250 | NR    |          |     |
|       | 0.00500 | 5.0  | 4  | 8 | 2.670 | NR    |          |     |
|       | 0.00500 | 5.0  | 4  | 8 | 2.270 | NR    |          |     |
|       | 0.01000 | 0.5  | 4  | 8 | 2.570 | NR    |          |     |
|       | 0.01000 | 0.5  | 4  | 8 | 1.900 | NR    |          |     |
|       | 0.01000 | 2.0  | 4  | 8 | 2.780 | NR    |          |     |
|       | 0.01000 | 2.0  | 4  | 8 | 2.050 | NR    |          |     |

|        |         |       |    |   |       |       |                |      |
|--------|---------|-------|----|---|-------|-------|----------------|------|
|        | 0.01000 | 5.0   | 4  | 8 | 2.660 | NR    |                |      |
|        | 0.01000 | 5.0   | 4  | 8 | 2.210 | NR    |                |      |
|        | 0.02000 | 0.5   | 25 | 6 | 1.000 | NR    | spinach        | (10) |
| Citrox | 0.12500 | 1.0   | 8  | 3 | 0.100 | 0.058 | lettuce        | (11) |
|        | 0.25000 | 1.0   | 8  | 3 | 0.200 | 0.058 |                |      |
|        | 0.25000 | 1.0   | 8  | 3 | 0.400 | 0.058 |                |      |
|        | 0.37500 | 1.0   | 8  | 3 | 1.030 | 0.173 |                |      |
|        | 0.37500 | 1.0   | 8  | 3 | 1.200 | 0.058 |                |      |
|        | 0.50000 | 1.0   | 8  | 3 | 1.300 | 0.115 |                |      |
|        | 0.50000 | 1.0   | 8  | 3 | 2.200 | 0.173 |                |      |
|        | 0.50000 | 1.0   | 8  | 3 | 1.600 | 0.082 |                |      |
| CD     | 0.00043 | 30.0  | 22 | 6 | 3.400 | NR    | lettuce        | (12) |
|        | 0.00067 | 60.0  | 22 | 6 | 4.400 | NR    |                |      |
|        | 0.00087 | 180.0 | 22 | 6 | 6.900 | NR    |                |      |
|        | 0.00005 | 2.0   | 22 | 6 | 1.200 | NR    | strawberry     | (13) |
|        | 0.00005 | 10.0  | 22 | 6 | 2.400 | NR    |                |      |
|        | 0.00015 | 10.0  | 22 | 6 | 3.000 | NR    |                |      |
|        | 0.00030 | 10.0  | 22 | 6 | 4.500 | NR    |                |      |
|        | 0.00050 | 2.0   | 22 | 6 | 1.800 | NR    |                |      |
|        | 0.00050 | 10.0  | 22 | 6 | 4.600 | NR    |                |      |
|        | 0.00005 | 2.0   | 22 | 6 | 0.600 | NR    | cantaloupe     |      |
|        | 0.00005 | 10.0  | 22 | 6 | 2.700 | NR    |                |      |
|        | 0.00010 | 2.0   | 22 | 6 | 1.100 | NR    |                |      |
|        | 0.00010 | 10.0  | 22 | 6 | 2.700 | NR    |                |      |
|        | 0.00015 | 2.0   | 22 | 6 | 1.100 | NR    |                |      |
|        | 0.00015 | 10.0  | 22 | 6 | 2.800 | NR    |                |      |
|        | 0.00030 | 2.0   | 22 | 6 | 2.200 | NR    |                |      |
|        | 0.00030 | 10.0  | 22 | 6 | 3.400 | NR    |                |      |
|        | 0.00050 | 2.0   | 22 | 6 | 2.200 | NR    |                |      |
|        | 0.00050 | 10.0  | 22 | 6 | 4.600 | NR    |                |      |
|        | 0.00012 | 30.0  | 25 | 6 | 0.700 | NR    | spinach        | (10) |
|        | 0.00021 | 60.0  | 25 | 6 | 0.700 | NR    |                |      |
|        | 0.00014 | 10.5  | 22 | 9 | 1.530 | NR    | cabbage        | (14) |
|        | 0.00027 | 20.0  | 22 | 9 | 2.680 | NR    |                |      |
|        | 0.00041 | 30.8  | 22 | 9 | 3.130 | NR    |                |      |
|        | 0.00014 | 10.5  | 22 | 9 | 2.030 | NR    | carrot         |      |
|        | 0.00027 | 20.0  | 22 | 9 | 3.180 | NR    |                |      |
|        | 0.00041 | 30.8  | 22 | 9 | 5.620 | NR    |                |      |
|        | 0.00014 | 10.5  | 22 | 9 | 0.640 | NR    | lettuce        |      |
|        | 0.00027 | 20.0  | 22 | 9 | 0.720 | NR    |                |      |
|        | 0.00041 | 30.8  | 22 | 9 | 1.570 | NR    |                |      |
| DA     | 0.00200 | 2.0   | 22 | 6 | 0.610 | 0.212 | romainelettuce | (15) |
|        | 0.00200 | 2.0   | 22 | 6 | 0.690 | 0.103 |                |      |
| DioW   | 0.00000 | 5.0   | 25 | 6 | 0.140 | 0.294 | rocketleaves   | (16) |
|        | 0.00000 | 0.5   | 4  | 6 | 1.770 | NR    | broccoli       | (9)  |
|        | 0.00000 | 2.0   | 4  | 6 | 1.560 | NR    |                |      |
|        | 0.00000 | 5.0   | 4  | 6 | 1.920 | NR    |                |      |
|        | 0.00000 | 0.5   | 4  | 8 | 1.670 | NR    | lettuce        |      |

|      |         |      |    |    |       |       |                 |      |
|------|---------|------|----|----|-------|-------|-----------------|------|
|      | 0.00000 | 0.5  | 4  | 8  | 1.340 | NR    |                 |      |
|      | 0.00000 | 2.0  | 4  | 8  | 1.730 | NR    |                 |      |
|      | 0.00000 | 2.0  | 4  | 8  | 1.800 | NR    |                 |      |
|      | 0.00000 | 5.0  | 4  | 8  | 1.750 | NR    |                 |      |
|      | 0.00000 | 5.0  | 4  | 8  | 1.480 | NR    |                 |      |
|      | 0.00000 | 2.0  | 50 | 3  | 1.600 | 0.115 | babyspinach     | (1)  |
|      | 0.00000 | 5.0  | 22 | 3  | 1.100 | 0.058 |                 |      |
|      | 0.00000 | 5.0  | 40 | 3  | 1.100 | 0.115 |                 |      |
|      | 0.01000 | 2.0  | 50 | 3  | 1.300 | 0.115 |                 |      |
|      | 0.01000 | 5.0  | 22 | 3  | 0.900 | 0.058 |                 |      |
|      | 0.01000 | 5.0  | 40 | 3  | 1.200 | 0.115 |                 |      |
|      | 0.00000 | 2.0  | 22 | 3  | 0.770 | 0.258 | romainelettuce  | (15) |
|      | 0.00000 | 2.0  | 22 | 3  | 0.480 | 0.092 |                 |      |
|      | 0.00000 | 3.0  | 23 | 3  | 0.850 | 0.224 | spinach         | (6)  |
|      | 0.00000 | 3.0  | 20 | 3  | 0.420 | 0.223 | mungbean        | (17) |
|      | 0.00000 | 5.0  | 20 | 3  | 0.480 | 0.301 |                 |      |
|      | 0.00000 | 10.0 | 20 | 3  | 0.330 | 0.288 |                 |      |
|      | 0.00000 | 15.0 | 20 | 3  | 0.360 | 0.194 |                 |      |
|      | 0.00000 | 3.0  | 20 | 3  | 0.410 | 0.270 | mungbeansprouts |      |
|      | 0.00000 | 5.0  | 20 | 3  | 0.580 | 0.362 |                 |      |
|      | 0.00000 | 10.0 | 20 | 3  | 0.510 | 0.401 |                 |      |
|      | 0.00000 | 15.0 | 20 | 3  | 0.360 | 0.348 |                 |      |
| DisW | 0.00000 | 5.0  | 15 | 3  | 0.300 | 0.082 | buckwheat       | (18) |
|      | 0.00000 | 3.0  | 23 | 6  | 0.330 | 0.070 | chinesecabbage  | (19) |
|      | 0.00000 | 3.0  | 23 | 6  | 0.380 | 0.070 | lettuce         |      |
|      | 0.00000 | 3.0  | 23 | 6  | 0.230 | 0.040 | sesameleaf      |      |
|      | 0.00000 | 3.0  | 23 | 6  | 0.260 | 0.020 | spinach         |      |
|      | 0.00000 | 5.0  | 25 | 8  | 3.100 | 0.146 | tomato          | (8)  |
|      | 0.00000 | 5.0  | 25 | 8  | 3.100 | 0.224 |                 |      |
|      | 0.00000 | 5.0  | 25 | 8  | 1.300 | 0.146 |                 |      |
|      | 0.00000 | 5.0  | 25 | 8  | 1.300 | 0.098 |                 |      |
|      | 0.00000 | 3.0  | 25 | 12 | 0.800 | 0.104 | cabbage         |      |
|      | 0.00000 | 3.0  | 25 | 12 | 0.700 | 0.155 |                 |      |
|      | 0.00000 | 3.0  | 25 | 12 | 0.500 | 0.122 | chinesecabbage  | (20) |
|      | 0.00000 | 3.0  | 25 | 12 | 0.700 | 0.163 |                 |      |
|      | 0.00000 | 3.0  | 25 | 12 | 0.800 | 0.082 | lettuce         |      |
|      | 0.00000 | 3.0  | 25 | 12 | 0.900 | 0.104 |                 |      |
|      | 0.00000 | 3.0  | 25 | 12 | 0.800 | 0.041 | spinach         |      |
|      | 0.00000 | 3.0  | 25 | 12 | 1.000 | 0.183 |                 |      |
|      | 0.00000 | 2.0  | 55 | 9  | 0.590 | NR    | apple           | (21) |
|      | 0.00000 | 0.3  | 25 | 6  | 0.700 | NR    | spinach         | (10) |
|      | 0.00000 | 1.5  | 25 | 6  | 0.340 | 0.024 | mungbeansprouts | (22) |
|      | 0.00000 | 3.0  | 25 | 6  | 0.400 | 0.041 |                 |      |
|      | 0.00000 | 2.0  | 22 | 3  | 1.040 | 0.408 | lettuce         | (23) |
|      | 0.00000 | 5.0  | 20 | 6  | 0.300 | 0.069 | lettuce         | (7)  |
|      | 0.00000 | 5.0  | 22 | 6  | 0.700 | NR    | apple           | (24) |
|      | 0.00000 | 5.0  | 22 | 6  | 1.000 | NR    |                 |      |

|     |         |      |    |   |       |       |                |      |
|-----|---------|------|----|---|-------|-------|----------------|------|
|     | 0.00000 | 1.0  | 22 | 6 | 0.180 | 0.417 | lettuce        | (5)  |
|     | 0.00000 | 1.0  | 22 | 6 | 0.410 | 0.400 |                |      |
|     | 0.00000 | 1.0  | 22 | 6 | 1.320 | 0.771 | tomato         |      |
|     | 0.00000 | 1.0  | 22 | 6 | 1.540 | 0.794 |                |      |
| EHS | 0.00200 | 2.0  | 22 | 6 | 0.550 | 0.137 | romainelettuce | (15) |
|     | 0.00200 | 2.0  | 22 | 6 | 0.590 | 0.068 |                |      |
| HP  | 0.01000 | 2.0  | 50 | 3 | 1.800 | 0.058 | babyspinach    | (1)  |
|     | 0.01000 | 2.0  | 50 | 3 | 1.900 | 0.231 |                |      |
|     | 0.01000 | 5.0  | 22 | 3 | 1.100 | 0.115 |                |      |
|     | 0.01000 | 5.0  | 40 | 3 | 1.600 | 0.115 |                |      |
|     | 0.01000 | 5.0  | 22 | 3 | 1.100 | 0.000 |                |      |
|     | 0.01000 | 5.0  | 40 | 3 | 1.500 | 0.058 |                |      |
|     | 0.02000 | 2.0  | 50 | 3 | 2.200 | 0.058 |                |      |
|     | 0.02000 | 5.0  | 22 | 3 | 1.500 | 0.115 |                |      |
|     | 0.02000 | 5.0  | 40 | 3 | 1.900 | 0.173 |                |      |
| LA  | 0.01000 | 2.0  | 50 | 3 | 2.300 | 0.173 | babyspinach    | (1)  |
|     | 0.01000 | 2.0  | 50 | 3 | 2.500 | 0.173 |                |      |
|     | 0.01000 | 5.0  | 22 | 3 | 1.900 | 0.115 |                |      |
|     | 0.01000 | 5.0  | 40 | 3 | 2.700 | 0.115 |                |      |
|     | 0.01000 | 5.0  | 22 | 3 | 2.100 | 0.058 |                |      |
|     | 0.01000 | 5.0  | 40 | 3 | 2.700 | 0.058 |                |      |
|     | 0.02000 | 2.0  | 50 | 3 | 2.000 | 0.173 |                |      |
|     | 0.02000 | 5.0  | 22 | 3 | 1.700 | 0.058 |                |      |
|     | 0.02000 | 5.0  | 40 | 3 | 2.400 | 0.173 |                |      |
|     | 0.10000 | 5.0  | 25 | 8 | 2.700 | 0.098 | tomato         | (8)  |
|     | 0.10000 | 5.0  | 25 | 8 | 2.900 | 0.127 |                |      |
|     | 0.10000 | 5.0  | 25 | 8 | 1.500 | 0.146 |                |      |
|     | 0.10000 | 5.0  | 25 | 8 | 1.700 | 0.146 |                |      |
|     | 0.20000 | 1.0  | 8  | 3 | 0.200 | 0.058 | lettuce        | (11) |
|     | 0.20000 | 1.0  | 8  | 3 | 0.100 | 0.058 |                |      |
|     | 0.40000 | 1.0  | 8  | 3 | 0.200 | 0.058 |                |      |
|     | 0.40000 | 1.0  | 8  | 3 | 0.300 | 0.115 |                |      |
|     | 0.80000 | 1.0  | 8  | 3 | 0.100 | 0.058 |                |      |
|     | 0.80000 | 1.0  | 8  | 3 | 0.200 | 0.058 |                |      |
|     | 1.60000 | 1.0  | 8  | 3 | 0.600 | 0.058 |                |      |
|     | 1.60000 | 1.0  | 8  | 3 | 0.500 | 0.058 |                |      |
|     | 1.60000 | 1.0  | 8  | 3 | 1.500 | 0.129 |                |      |
|     | 0.02000 | 0.5  | 55 | 6 | 2.700 | NR    | spinach        | (10) |
|     | 0.00300 | 5.0  | 20 | 6 | 0.530 | 0.069 | lettuce        | (7)  |
|     | 0.00300 | 10.0 | 20 | 6 | 0.730 | 0.110 |                |      |
|     | 0.00300 | 20.0 | 20 | 6 | 1.870 | 0.245 |                |      |
|     | 0.00300 | 30.0 | 20 | 6 | 2.510 | 0.159 |                |      |
|     | 0.00500 | 5.0  | 20 | 6 | 0.670 | 0.131 |                |      |
|     | 0.00500 | 10.0 | 20 | 6 | 1.190 | 0.245 |                |      |
|     | 0.00500 | 20.0 | 20 | 6 | 1.880 | 0.216 |                |      |
|     | 0.00500 | 30.0 | 20 | 6 | 2.860 | 0.127 |                |      |
|     | 0.00700 | 5.0  | 20 | 6 | 0.970 | 0.225 |                |      |
|     | 0.00700 | 10.0 | 20 | 6 | 1.260 | 0.184 |                |      |

|    |         |      |    |    |       |       |                |      |
|----|---------|------|----|----|-------|-------|----------------|------|
|    | 0.00700 | 20.0 | 20 | 6  | 1.920 | 0.122 |                |      |
|    | 0.00700 | 30.0 | 20 | 6  | 3.090 | 0.106 |                |      |
|    | 0.01000 | 5.0  | 20 | 6  | 1.030 | 0.167 |                |      |
|    | 0.01000 | 10.0 | 20 | 6  | 1.570 | 0.278 |                |      |
|    | 0.01000 | 20.0 | 20 | 6  | 2.070 | 0.388 |                |      |
|    | 0.01000 | 30.0 | 20 | 6  | 3.420 | 0.302 |                |      |
|    | 0.02000 | 5.0  | 20 | 6  | 1.740 | 0.155 |                |      |
|    | 0.02000 | 10.0 | 20 | 6  | 2.220 | 0.408 |                |      |
|    | 0.02000 | 20.0 | 20 | 6  | 2.390 | 0.122 |                |      |
|    | 0.02000 | 30.0 | 20 | 6  | 3.560 | 0.220 |                |      |
|    | 0.02000 | 5.0  | 22 | 6  | 1.650 | NR    | apple          | (24) |
|    | 0.02000 | 5.0  | 22 | 6  | 2.100 | NR    |                |      |
|    | 0.01000 | 1.0  | 22 | 6  | 1.710 | 0.552 | lettuce        | (5)  |
|    | 0.01000 | 1.0  | 22 | 6  | 1.510 | 0.449 |                |      |
|    | 0.00200 | 1.0  | 22 | 6  | 2.190 | 0.754 |                |      |
|    | 0.00200 | 1.0  | 22 | 6  | 2.540 | 0.769 |                |      |
| MA | 0.01000 | 2.0  | 50 | 3  | 2.200 | 0.115 | babyspinach    | (1)  |
|    | 0.01000 | 2.0  | 50 | 3  | 2.200 | 0.115 |                |      |
|    | 0.01000 | 5.0  | 22 | 3  | 1.700 | 0.115 |                |      |
|    | 0.01000 | 5.0  | 40 | 3  | 2.300 | 0.115 |                |      |
|    | 0.01000 | 5.0  | 22 | 3  | 1.700 | 0.000 |                |      |
|    | 0.01000 | 5.0  | 40 | 3  | 2.400 | 0.231 |                |      |
|    | 0.02000 | 2.0  | 50 | 3  | 2.500 | 0.231 |                |      |
|    | 0.02000 | 5.0  | 22 | 3  | 1.800 | 0.173 |                |      |
|    | 0.02000 | 5.0  | 40 | 3  | 2.300 | 0.231 |                |      |
|    | 0.00300 | 5.0  | 20 | 6  | 0.570 | 0.057 | lettuce        | (7)  |
|    | 0.00300 | 10.0 | 20 | 6  | 0.970 | 0.041 |                |      |
|    | 0.00300 | 20.0 | 20 | 6  | 1.390 | 0.269 |                |      |
|    | 0.00300 | 30.0 | 20 | 6  | 1.610 | 0.041 |                |      |
|    | 0.00500 | 5.0  | 20 | 6  | 0.770 | 0.078 |                |      |
|    | 0.00500 | 10.0 | 20 | 6  | 1.110 | 0.139 |                |      |
|    | 0.00500 | 20.0 | 20 | 6  | 1.570 | 0.286 |                |      |
|    | 0.00500 | 30.0 | 20 | 6  | 1.930 | 0.053 |                |      |
|    | 0.00700 | 5.0  | 20 | 6  | 1.230 | 0.139 |                |      |
|    | 0.00700 | 10.0 | 20 | 6  | 1.250 | 0.135 |                |      |
|    | 0.00700 | 20.0 | 20 | 6  | 1.710 | 0.102 |                |      |
|    | 0.00700 | 30.0 | 20 | 6  | 2.280 | 0.188 |                |      |
|    | 0.01000 | 5.0  | 20 | 6  | 1.450 | 0.090 |                |      |
|    | 0.01000 | 10.0 | 20 | 6  | 1.450 | 0.233 |                |      |
|    | 0.01000 | 20.0 | 20 | 6  | 2.190 | 0.143 |                |      |
|    | 0.01000 | 30.0 | 20 | 6  | 3.280 | 0.159 |                |      |
|    | 0.02000 | 5.0  | 20 | 6  | 1.550 | 0.102 |                |      |
|    | 0.02000 | 10.0 | 20 | 6  | 1.850 | 0.057 |                |      |
|    | 0.02000 | 20.0 | 20 | 6  | 2.540 | 0.090 |                |      |
|    | 0.02000 | 30.0 | 20 | 6  | 3.790 | 0.069 |                |      |
| OW | 0.04640 | 3.0  | 25 | 12 | 0.800 | 0.104 | cabbage        | (22) |
|    | 0.04640 | 3.0  | 25 | 12 | 0.900 | 0.104 |                |      |
|    | 0.04640 | 3.0  | 25 | 12 | 0.600 | 0.104 | chinesecabbage |      |

|      |         |      |    |    |       |       |                 |      |
|------|---------|------|----|----|-------|-------|-----------------|------|
|      | 0.04640 | 3.0  | 25 | 12 | 0.700 | 0.185 |                 |      |
|      | 0.04640 | 3.0  | 25 | 12 | 1.000 | 0.104 | lettuce         |      |
|      | 0.04640 | 3.0  | 25 | 12 | 0.700 | 0.155 |                 |      |
|      | 0.04640 | 3.0  | 25 | 12 | 0.700 | 0.065 | spinach         |      |
|      | 0.04640 | 3.0  | 25 | 12 | 0.700 | 0.176 |                 |      |
|      | 0.00010 | 15.0 | 12 | 6  | 1.100 | NR    | spinach         | (10) |
|      | 0.00010 | 30.0 | 12 | 6  | 0.600 | NR    |                 |      |
|      | 0.00050 | 3.0  | 23 | 3  | 1.150 | 0.361 | spinach         | (6)  |
| Oz   | 0.01000 | 3.0  | 25 | 12 | 0.500 | 0.104 | cabbage         | (20) |
|      | 0.01000 | 3.0  | 25 | 12 | 0.200 | 0.155 |                 |      |
|      | 0.01000 | 3.0  | 25 | 12 | 0.000 | 0.122 | chinesecabbage  |      |
|      | 0.01000 | 3.0  | 25 | 12 | 0.000 | 0.208 |                 |      |
|      | 0.01000 | 3.0  | 25 | 12 | 0.100 | 0.065 | lettuce         |      |
|      | 0.01000 | 3.0  | 25 | 12 | 0.000 | 0.065 |                 |      |
|      | 0.01000 | 3.0  | 25 | 12 | 0.000 | 0.041 | spinach         |      |
|      | 0.01000 | 3.0  | 25 | 12 | 0.000 | 0.183 |                 |      |
| PAA  | 0.00800 | 5.0  | 25 | 6  | 1.200 | 0.303 | rocketleaves    | (16) |
|      | 0.00300 | 10.0 | 25 | 30 | 2.130 | 0.128 | lettuce         | (25) |
|      | 0.00400 | 10.0 | 25 | 30 | 2.330 | 0.097 |                 |      |
|      | 0.00500 | 10.0 | 25 | 30 | 2.470 | 0.148 |                 |      |
|      | 0.00300 | 10.0 | 25 | 30 | 3.860 | 0.217 | tomato          |      |
|      | 0.00400 | 10.0 | 25 | 30 | 4.390 | 0.283 |                 |      |
|      | 0.00500 | 10.0 | 25 | 30 | 4.480 | 0.268 |                 |      |
|      | 0.00800 | 0.5  | 25 | 6  | 1.100 | NR    | spinach         | (10) |
|      | 0.00250 | 1.5  | 25 | 6  | 1.450 | 0.143 | mungbeansprouts | (22) |
|      | 0.00250 | 3.0  | 25 | 6  | 1.720 | 0.065 |                 |      |
|      | 0.00510 | 1.5  | 25 | 6  | 1.500 | 0.012 |                 |      |
|      | 0.00510 | 3.0  | 25 | 6  | 2.200 | 0.102 |                 |      |
|      | 0.00700 | 1.5  | 25 | 6  | 2.200 | 0.082 |                 |      |
|      | 0.00700 | 3.0  | 25 | 6  | 2.400 | 0.029 |                 |      |
|      | 0.00700 | 3.0  | 25 | 3  | 2.300 | 0.058 |                 |      |
|      | 0.00800 | 2.0  | 22 | 3  | 1.070 | 0.516 | lettuce         | (23) |
|      | 0.00400 | 2.0  | 22 | 3  | 1.520 | 0.184 | carrot          | (3)  |
|      | 0.00400 | 2.0  | 22 | 3  | 1.160 | 0.184 |                 |      |
|      | 0.00400 | 2.0  | 22 | 3  | 0.100 | 0.071 |                 |      |
|      | 0.00400 | 2.0  | 22 | 3  | 0.200 | 0.112 |                 |      |
| Phy  | 0.10000 | 5.0  | 25 | 8  | 5.100 | 0.098 | tomato          | (8)  |
|      | 0.10000 | 5.0  | 25 | 8  | 4.800 | 0.079 |                 |      |
|      | 0.10000 | 5.0  | 25 | 8  | 1.400 | 0.146 |                 |      |
|      | 0.10000 | 5.0  | 25 | 8  | 1.700 | 0.146 |                 |      |
| SAEW | 0.00215 | 3.0  | 23 | 6  | 1.220 | 0.045 | chinesecabbage  | (19) |
|      | 0.00215 | 3.0  | 23 | 6  | 1.250 | 0.090 |                 |      |
|      | 0.00215 | 3.0  | 23 | 6  | 1.230 | 0.024 | lettuce         |      |
|      | 0.00215 | 3.0  | 23 | 6  | 1.360 | 0.050 |                 |      |
|      | 0.00215 | 3.0  | 23 | 6  | 1.150 | 0.053 | sesameleaf      |      |
|      | 0.00215 | 3.0  | 23 | 6  | 1.200 | 0.120 |                 |      |
|      | 0.00215 | 3.0  | 23 | 6  | 1.120 | 0.069 | spinach         |      |

|    |         |      |    |    |       |       |                 |      |
|----|---------|------|----|----|-------|-------|-----------------|------|
|    | 0.00215 | 3.0  | 23 | 6  | 1.150 | 0.070 |                 |      |
|    | 0.00214 | 5.0  | 20 | 16 | 2.850 | 0.013 | daikon          | (26) |
|    | 0.00214 | 5.0  | 20 | 16 | 2.840 | 0.023 | lettuce         |      |
|    | 0.00050 | 3.0  | 23 | 3  | 2.550 | 0.283 | spinach         | (6)  |
|    | 0.00500 | 3.0  | 23 | 3  | 2.350 | 0.361 |                 |      |
|    | 0.00200 | 3.0  | 20 | 3  | 1.530 | 0.233 | mungbean        | (17) |
|    | 0.00200 | 5.0  | 20 | 3  | 1.620 | 0.248 |                 |      |
|    | 0.00200 | 10.0 | 20 | 3  | 1.750 | 0.371 |                 |      |
|    | 0.00200 | 15.0 | 20 | 3  | 1.780 | 0.213 |                 |      |
|    | 0.00400 | 3.0  | 20 | 3  | 2.310 | 0.341 |                 |      |
|    | 0.00400 | 5.0  | 20 | 3  | 2.350 | 0.336 |                 |      |
|    | 0.00400 | 10.0 | 20 | 3  | 2.370 | 0.358 |                 |      |
|    | 0.00400 | 15.0 | 20 | 3  | 2.520 | 0.121 |                 |      |
|    | 0.00600 | 3.0  | 20 | 3  | 2.930 | 0.328 |                 |      |
|    | 0.00600 | 5.0  | 20 | 3  | 2.960 | 0.284 |                 |      |
|    | 0.00600 | 10.0 | 20 | 3  | 3.060 | 0.290 |                 |      |
|    | 0.00600 | 15.0 | 20 | 3  | 3.400 | 0.359 |                 |      |
|    | 0.00800 | 3.0  | 20 | 3  | 3.980 | 0.196 |                 |      |
|    | 0.00800 | 5.0  | 20 | 3  | 4.050 | 0.248 |                 |      |
|    | 0.00800 | 10.0 | 20 | 3  | 4.060 | 0.297 |                 |      |
|    | 0.00800 | 15.0 | 20 | 3  | 4.240 | 0.323 |                 |      |
|    | 0.00200 | 3.0  | 20 | 3  | 1.320 | 0.285 | mungbeansprouts |      |
|    | 0.00200 | 5.0  | 20 | 3  | 1.350 | 0.186 |                 |      |
|    | 0.00200 | 10.0 | 20 | 3  | 1.500 | 0.513 |                 |      |
|    | 0.00200 | 15.0 | 20 | 3  | 1.560 | 0.458 |                 |      |
|    | 0.00400 | 3.0  | 20 | 3  | 2.250 | 0.388 |                 |      |
|    | 0.00400 | 5.0  | 20 | 3  | 2.260 | 0.340 |                 |      |
|    | 0.00400 | 10.0 | 20 | 3  | 2.380 | 0.576 |                 |      |
|    | 0.00400 | 15.0 | 20 | 3  | 2.400 | 0.406 |                 |      |
|    | 0.00800 | 3.0  | 20 | 3  | 3.320 | 0.277 |                 |      |
|    | 0.00800 | 5.0  | 20 | 3  | 3.410 | 0.277 |                 |      |
|    | 0.00800 | 10.0 | 20 | 3  | 3.440 | 0.341 |                 |      |
|    | 0.00800 | 15.0 | 20 | 3  | 3.350 | 0.550 |                 |      |
|    | 0.01200 | 3.0  | 20 | 3  | 4.290 | 0.253 |                 |      |
|    | 0.01200 | 5.0  | 20 | 3  | 4.370 | 0.354 |                 |      |
|    | 0.01200 | 10.0 | 20 | 3  | 4.390 | 0.288 |                 |      |
|    | 0.01200 | 15.0 | 20 | 3  | 4.510 | 0.297 |                 |      |
| SC | 0.10000 | 1.0  | 5  | 3  | 2.990 | 0.366 | cilantro        | (2)  |
| SH | 0.02000 | 1.0  | 5  | 3  | 1.074 | 0.103 | cilantro        | (2)  |
|    | 0.02000 | 5.0  | 25 | 6  | 0.770 | 0.370 | rocketleaves    | (16) |
|    | 0.02000 | 2.0  | 50 | 3  | 1.600 | 0.115 | babyspinach     | (1)  |
|    | 0.02000 | 5.0  | 22 | 3  | 1.200 | 0.058 |                 |      |
|    | 0.02000 | 5.0  | 40 | 3  | 1.400 | 0.115 |                 |      |
|    | 0.01000 | 5.0  | 25 | 8  | 5.200 | 0.050 | tomato          | (8)  |
|    | 0.01000 | 5.0  | 25 | 8  | 4.800 | 0.071 |                 |      |
|    | 0.01000 | 5.0  | 25 | 8  | 1.400 | 0.146 |                 |      |
|    | 0.01000 | 5.0  | 25 | 8  | 1.200 | 0.180 |                 |      |
|    | 0.01000 | 3.0  | 25 | 12 | 1.800 | 0.183 | cabbage         |      |



|         |         |     |    |       |       |                 |             |     |
|---------|---------|-----|----|-------|-------|-----------------|-------------|-----|
| 0.01000 | 3.0     | 25  | 12 | 1.800 | 0.104 |                 |             |     |
| 0.01000 | 3.0     | 25  | 12 | 0.900 | 0.122 | chinesecabbage  |             |     |
| 0.01000 | 3.0     | 25  | 12 | 1.000 | 0.208 |                 |             |     |
| 0.01000 | 3.0     | 25  | 12 | 1.600 | 0.129 | lettuce         |             |     |
| 0.01000 | 3.0     | 25  | 12 | 1.400 | 0.183 |                 |             |     |
| 0.01000 | 3.0     | 25  | 12 | 1.100 | 0.065 | spinach         |             |     |
| 0.01000 | 3.0     | 25  | 12 | 1.100 | 0.208 |                 |             |     |
| 0.01000 | 5.0     | 20  | 16 | 2.610 | 0.008 | chinesececery   | (26)        |     |
| 0.01000 | 5.0     | 20  | 16 | 2.790 | 0.010 | daikon          |             |     |
| 0.01000 | 5.0     | 20  | 16 | 2.760 | 0.020 | lettuce         |             |     |
| 0.00250 | 10.0    | 25  | 30 | 1.000 | 0.099 | lettuce         | (25)        |     |
| 0.00500 | 10.0    | 25  | 30 | 1.050 | 0.091 |                 |             |     |
| 0.00750 | 10.0    | 25  | 30 | 1.290 | 0.089 |                 |             |     |
| 0.00250 | 10.0    | 25  | 30 | 2.270 | 0.104 | tomato          |             |     |
| 0.00500 | 10.0    | 25  | 30 | 2.670 | 0.137 |                 |             |     |
| 0.00750 | 10.0    | 25  | 30 | 3.070 | 0.144 |                 |             |     |
| 0.01000 | 2.0     | 22  | 6  | 0.890 | 0.130 | romainelettuce  | (15)        |     |
| 0.01000 | 2.0     | 22  | 6  | 0.860 | 0.099 |                 |             |     |
| 0.02000 | 2.0     | 22  | 3  | 0.870 | 0.081 |                 |             |     |
| 0.02000 | 2.0     | 22  | 3  | 0.800 | 0.086 |                 |             |     |
| 0.00100 | 1.0     | 8   | 3  | 0.800 | 0.289 | lettuce         | (11)        |     |
| 0.00100 | 1.0     | 8   | 3  | 1.200 | 0.173 |                 |             |     |
| 0.00200 | 1.0     | 8   | 3  | 0.900 | 0.058 |                 |             |     |
| 0.00200 | 1.0     | 8   | 3  | 1.000 | 0.058 |                 |             |     |
| 0.00400 | 1.0     | 8   | 3  | 2.100 | 0.129 |                 |             |     |
| 0.01060 | 1.5     | 25  | 6  | 1.500 | 0.041 | mungbeansprouts | (22)        |     |
| 0.01060 | 3.0     | 25  | 6  | 1.950 | 0.069 |                 |             |     |
| 0.01300 | 1.5     | 25  | 6  | 1.700 | 0.139 |                 |             |     |
| 0.01300 | 3.0     | 25  | 6  | 1.900 | 0.069 |                 |             |     |
| 0.01700 | 1.5     | 25  | 6  | 1.800 | 0.061 |                 |             |     |
| 0.01700 | 3.0     | 25  | 6  | 2.100 | 0.061 |                 |             |     |
| 0.01700 | 3.0     | 25  | 3  | 2.000 | 0.058 |                 |             |     |
| 0.00200 | 2.0     | 22  | 3  | 0.960 | 0.408 | lettuce         | (23)        |     |
| 0.01000 | 3.0     | 23  | 3  | 1.750 | 0.362 | spinach         | (6)         |     |
| 0.02000 | 2.0     | 22  | 3  | 1.270 | 0.086 | carrot          | (3)         |     |
| 0.02000 | 2.0     | 22  | 3  | 1.150 | 0.086 |                 |             |     |
| 0.02000 | 2.0     | 22  | 3  | 0.600 | 0.071 |                 |             |     |
| 0.02000 | 2.0     | 22  | 3  | 0.300 | 0.112 |                 |             |     |
| 0.01000 | 2.0     | 5   | 3  | 1.370 | 0.083 | tatsoi          | (4)         |     |
| 0.02000 | 1.0     | 22  | 6  | 1.310 | 0.460 | lettuce         | (5)         |     |
| 0.02000 | 1.0     | 22  | 6  | 1.400 | 0.402 |                 |             |     |
| 0.02000 | 1.0     | 22  | 6  | 2.560 | 0.749 | tomato          |             |     |
| 0.02000 | 1.0     | 22  | 6  | 2.650 | 0.752 |                 |             |     |
| TA      | 0.01000 | 2.0 | 50 | 3     | 2.000 | 0.173           | babyspinach | (1) |
|         | 0.01000 | 5.0 | 22 | 3     | 1.500 | 0.058           |             |     |
|         | 0.01000 | 5.0 | 40 | 3     | 2.200 | 0.231           |             |     |
|         | 0.02000 | 2.0 | 50 | 3     | 2.100 | 0.058           |             |     |
|         | 0.02000 | 5.0 | 22 | 3     | 1.700 | 0.173           |             |     |

|         |         |      |    |    |       |       |         |      |
|---------|---------|------|----|----|-------|-------|---------|------|
|         | 0.02000 | 5.0  | 40 | 3  | 2.100 | 0.115 |         |      |
| Tsunami | 0.01250 | 1.0  | 8  | 3  | 1.500 | 0.115 | lettuce | (11) |
|         | 0.01250 | 1.0  | 8  | 3  | 2.600 | 0.404 |         |      |
|         | 0.02500 | 1.0  | 8  | 3  | 1.900 | 0.058 |         |      |
|         | 0.02500 | 1.0  | 8  | 3  | 2.900 | 0.289 |         |      |
|         | 0.03750 | 1.0  | 8  | 3  | 3.300 | 0.289 |         |      |
|         | 0.05000 | 1.0  | 8  | 3  | 2.200 | 0.238 |         |      |
| Water   | 0.00000 | 5.0  | 20 | 16 | 0.610 | 0.010 | daikon  | (26) |
|         | 0.00000 | 5.0  | 20 | 16 | 0.600 | 0.020 | lettuce |      |
|         | 0.00000 | 10.0 | 25 | 30 | 0.040 | 0.099 | lettuce | (25) |
|         | 0.00000 | 10.0 | 25 | 30 | 0.000 | 0.000 | tomato  |      |
|         | 0.00000 | 1.0  | 8  | 3  | 0.500 | 0.183 | lettuce | (11) |
|         | 0.00000 | 2.0  | 22 | 3  | 0.390 | 0.106 | carrot  | (3)  |
|         | 0.00000 | 2.0  | 22 | 3  | 0.200 | 0.114 |         |      |
|         | 0.00000 | 2.0  | 22 | 3  | 0.200 | 0.112 |         |      |
|         | 0.00000 | 2.0  | 22 | 3  | 0.000 | 0.064 |         |      |
|         | 0.00000 | 2.0  | 5  | 3  | 0.200 | 0.037 | tatsoi  | (4)  |

NR: Not reported in the respective primary study

Table 2. Meta-analytical data of the mean reduction of *Listeria monocytogenes* counts produced by washing fresh produce with sanitizing agents, along with extracted study characteristics of sanitizer concentration, washing time and temperature, type of food, and sample size N used to estimate a single log-reduction value and its standard error

| Sanitizer | Concent (%) | Time (min) | Temp (°C) | N     | Reduction (log CFU/g) | St. Error (log CFU/g) | Food          | Source |
|-----------|-------------|------------|-----------|-------|-----------------------|-----------------------|---------------|--------|
| ASC       | 0.05000     | 10.0       | 20        | 6     | 2.510                 | 0.233                 | carrot        | (27)   |
|           | 0.05000     | 10.0       | 20        | 6     | 2.890                 | 0.102                 | cherry tomato |        |
|           | 0.05000     | 10.0       | 20        | 6     | 3.350                 | 0.020                 | cucumber      |        |
|           | 0.01000     | 1.0        | 22        | 3     | 4.200                 | 0.200                 | carrot        | (3)    |
|           | 0.01000     | 1.0        | 22        | 3     | 4.300                 | 0.206                 |               |        |
|           | 0.02500     | 1.0        | 22        | 3     | 4.300                 | 0.206                 |               |        |
|           | 0.02500     | 1.0        | 22        | 3     | 4.400                 | 0.202                 |               |        |
|           | 0.05000     | 1.0        | 22        | 3     | 4.400                 | 0.206                 |               |        |
| 0.05000   | 1.0         | 22         | 3         | 4.500 | 0.202                 |                       |               |        |
| CA        | 0.01000     | 3.0        | 23        | 3     | 1.800                 | 0.212                 | spinach       | (6)    |
|           | 0.00300     | 5.0        | 20        | 6     | 0.560                 | 0.065                 | lettuce       | (7)    |
|           | 0.00300     | 10.0       | 20        | 6     | 0.570                 | 0.131                 |               |        |
|           | 0.00300     | 20.0       | 20        | 6     | 0.800                 | 0.045                 |               |        |
|           | 0.00300     | 30.0       | 20        | 6     | 1.180                 | 0.204                 |               |        |
|           | 0.00500     | 5.0        | 20        | 6     | 0.710                 | 0.078                 |               |        |
|           | 0.00500     | 10.0       | 20        | 6     | 0.890                 | 0.220                 |               |        |
|           | 0.00500     | 20.0       | 20        | 6     | 1.050                 | 0.073                 |               |        |
|           | 0.00500     | 30.0       | 20        | 6     | 1.880                 | 0.278                 |               |        |
|           | 0.00700     | 5.0        | 20        | 6     | 1.140                 | 0.204                 |               |        |
|           | 0.00700     | 10.0       | 20        | 6     | 0.970                 | 0.053                 |               |        |
|           | 0.00700     | 20.0       | 20        | 6     | 1.930                 | 0.278                 |               |        |
|           | 0.00700     | 30.0       | 20        | 6     | 1.910                 | 0.241                 |               |        |
|           | 0.01000     | 5.0        | 20        | 6     | 1.350                 | 0.171                 |               |        |
|           | 0.01000     | 10.0       | 20        | 6     | 1.520                 | 0.245                 |               |        |
|           | 0.01000     | 20.0       | 20        | 6     | 2.120                 | 0.208                 |               |        |
|           | 0.01000     | 30.0       | 20        | 6     | 2.490                 | 0.294                 |               |        |
|           | 0.02000     | 5.0        | 20        | 6     | 1.460                 | 0.073                 |               |        |
|           | 0.02000     | 10.0       | 20        | 6     | 1.650                 | 0.159                 |               |        |
|           | 0.02000     | 20.0       | 20        | 6     | 2.010                 | 0.135                 |               |        |
| 0.02000   | 30.0        | 20         | 6         | 3.120 | 0.363                 |                       |               |        |
| CD        | 0.00043     | 30.0       | 22        | 6     | 5.000                 | NR                    | lettuce       | (12)   |
|           | 0.00067     | 60.0       | 22        | 6     | 5.200                 | NR                    |               |        |
|           | 0.00087     | 180.0      | 22        | 6     | 5.400                 | NR                    |               |        |
|           | 0.00005     | 2.0        | 22        | 6     | 0.800                 | NR                    | strawberry    | (13)   |
|           | 0.00005     | 10.0       | 22        | 6     | 2.300                 | NR                    |               |        |
|           | 0.00030     | 10.0       | 22        | 6     | 4.600                 | NR                    |               |        |
|           | 0.00050     | 2.0        | 22        | 6     | 2.400                 | NR                    |               |        |
|           | 0.00050     | 10.0       | 22        | 6     | 4.700                 | NR                    |               |        |
|           | 0.00005     | 2.0        | 22        | 6     | 1.200                 | NR                    | cantaloupe    |        |
|           | 0.00005     | 10.0       | 22        | 6     | 3.300                 | NR                    |               |        |
| 0.00010   | 2.0         | 22         | 6         | 1.800 | NR                    |                       |               |        |

|      |         |      |    |   |       |       |                 |      |
|------|---------|------|----|---|-------|-------|-----------------|------|
|      | 0.00010 | 10.0 | 22 | 6 | 3.200 | NR    | cantaloupe      | (28) |
|      | 0.00015 | 2.0  | 22 | 6 | 2.100 | NR    |                 |      |
|      | 0.00015 | 10.0 | 22 | 6 | 3.700 | NR    |                 |      |
|      | 0.00030 | 2.0  | 22 | 6 | 2.100 | NR    |                 |      |
|      | 0.00030 | 10.0 | 22 | 6 | 3.800 | NR    |                 |      |
|      | 0.00050 | 2.0  | 22 | 6 | 2.200 | NR    |                 |      |
|      | 0.00050 | 10.0 | 22 | 6 | 4.300 | NR    |                 |      |
|      | 0.00014 | 10.0 | 22 | 9 | 1.760 | NR    | cabbage         | (14) |
|      | 0.00027 | 19.3 | 22 | 9 | 3.310 | NR    |                 |      |
|      | 0.00041 | 29.3 | 22 | 9 | 3.600 | NR    |                 |      |
|      | 0.00014 | 10.0 | 22 | 9 | 3.280 | NR    | carrot          |      |
|      | 0.00027 | 19.3 | 22 | 9 | 5.350 | NR    |                 |      |
|      | 0.00041 | 29.3 | 22 | 9 | 5.880 | NR    |                 |      |
|      | 0.00014 | 10.0 | 22 | 9 | 0.810 | NR    | lettuce         |      |
|      | 0.00027 | 19.3 | 22 | 9 | 1.230 | NR    |                 |      |
|      | 0.00041 | 29.3 | 22 | 9 | 1.530 | NR    |                 |      |
| DioW | 0.00000 | 3.0  | 23 | 3 | 1.000 | 0.212 | spinach         | (6)  |
|      | 0.00000 | 0.5  | 25 | 4 | 0.000 | 0.000 | lettuce         | (29) |
|      | 0.00000 | 1.0  | 25 | 4 | 0.000 | 0.000 |                 |      |
| DisW | 0.00000 | 1.0  | 4  | 6 | 0.580 | 0.055 | broccoli        | (30) |
|      | 0.00000 | 1.0  | 4  | 6 | 0.950 | 0.074 | cabbage         |      |
|      | 0.00000 | 1.0  | 4  | 6 | 0.860 | 0.297 | mungbeansprouts |      |
|      | 0.00000 | 3.0  | 23 | 6 | 0.350 | 0.160 | chinesecabbage  | (19) |
|      | 0.00000 | 3.0  | 23 | 6 | 0.400 | 0.070 | lettuce         |      |
|      | 0.00000 | 3.0  | 23 | 6 | 0.320 | 0.110 | sesameleaf      |      |
|      | 0.00000 | 3.0  | 23 | 6 | 0.200 | 0.070 | spinach         |      |
|      | 0.00000 | 1.5  | 25 | 6 | 0.370 | 0.098 | mungbeansprouts | (22) |
|      | 0.00000 | 3.0  | 25 | 6 | 0.300 | 0.135 | mungbeansprouts |      |
|      | 0.00000 | 5.0  | 20 | 6 | 0.230 | 0.069 | lettuce         | (7)  |
|      | 0.00000 | 4.0  | 22 | 6 | 0.230 | 0.153 | cucumber        | (31) |
|      | 0.00000 | 4.0  | 22 | 6 | 0.240 | 0.130 | lettuce         |      |
|      | 0.00000 | 4.0  | 22 | 6 | 0.250 | 0.104 |                 |      |
| HP   | 0.02000 | 1.0  | 25 | 4 | 3.700 | NR    | cucumber        | (32) |
| LA   | 0.00300 | 5.0  | 20 | 6 | 0.500 | 0.053 | lettuce         | (7)  |
|      | 0.00300 | 10.0 | 20 | 6 | 0.700 | 0.155 |                 |      |
|      | 0.00300 | 20.0 | 20 | 6 | 1.710 | 0.212 |                 |      |
|      | 0.00300 | 30.0 | 20 | 6 | 2.520 | 0.155 |                 |      |
|      | 0.00500 | 5.0  | 20 | 6 | 0.610 | 0.049 |                 |      |
|      | 0.00500 | 10.0 | 20 | 6 | 0.900 | 0.065 |                 |      |
|      | 0.00500 | 20.0 | 20 | 6 | 1.740 | 0.176 |                 |      |
|      | 0.00500 | 30.0 | 20 | 6 | 2.650 | 0.200 |                 |      |
|      | 0.00700 | 5.0  | 20 | 6 | 0.880 | 0.041 |                 |      |
|      | 0.00700 | 10.0 | 20 | 6 | 1.130 | 0.037 |                 |      |
|      | 0.00700 | 20.0 | 20 | 6 | 2.030 | 0.171 |                 |      |
|      | 0.00700 | 30.0 | 20 | 6 | 3.030 | 0.082 |                 |      |
|      | 0.01000 | 5.0  | 20 | 6 | 1.170 | 0.045 |                 |      |
|      | 0.01000 | 10.0 | 20 | 6 | 1.200 | 0.057 |                 |      |

|          |         |      |    |   |       |       |                 |      |
|----------|---------|------|----|---|-------|-------|-----------------|------|
|          | 0.01000 | 20.0 | 20 | 6 | 2.140 | 0.241 |                 |      |
|          | 0.01000 | 30.0 | 20 | 6 | 3.450 | 0.102 |                 |      |
|          | 0.02000 | 5.0  | 20 | 6 | 1.300 | 0.045 |                 |      |
|          | 0.02000 | 10.0 | 20 | 6 | 1.940 | 0.151 |                 |      |
|          | 0.02000 | 20.0 | 20 | 6 | 2.570 | 0.192 |                 |      |
|          | 0.02000 | 30.0 | 20 | 6 | 3.950 | 0.106 |                 |      |
| MA       | 0.00300 | 5.0  | 20 | 6 | 0.560 | 0.090 | lettuce         | (7)  |
|          | 0.00300 | 10.0 | 20 | 6 | 0.900 | 0.090 |                 |      |
|          | 0.00300 | 20.0 | 20 | 6 | 1.440 | 0.261 |                 |      |
|          | 0.00300 | 30.0 | 20 | 6 | 1.930 | 0.037 |                 |      |
|          | 0.00500 | 5.0  | 20 | 6 | 0.890 | 0.082 |                 |      |
|          | 0.00500 | 10.0 | 20 | 6 | 1.320 | 0.176 |                 |      |
|          | 0.00500 | 20.0 | 20 | 6 | 2.020 | 0.102 |                 |      |
|          | 0.00500 | 30.0 | 20 | 6 | 2.500 | 0.163 |                 |      |
|          | 0.00700 | 5.0  | 20 | 6 | 1.410 | 0.110 |                 |      |
|          | 0.00700 | 10.0 | 20 | 6 | 1.660 | 0.176 |                 |      |
|          | 0.00700 | 20.0 | 20 | 6 | 2.470 | 0.400 |                 |      |
|          | 0.00700 | 30.0 | 20 | 6 | 3.390 | 0.118 |                 |      |
|          | 0.01000 | 5.0  | 20 | 6 | 1.610 | 0.102 |                 |      |
|          | 0.01000 | 10.0 | 20 | 6 | 2.120 | 0.110 |                 |      |
|          | 0.01000 | 20.0 | 20 | 6 | 3.330 | 0.225 |                 |      |
|          | 0.01000 | 30.0 | 20 | 6 | 5.670 | 0.163 |                 |      |
|          | 0.02000 | 5.0  | 20 | 6 | 1.760 | 0.110 |                 |      |
|          | 0.02000 | 10.0 | 20 | 6 | 2.640 | 0.049 |                 |      |
|          | 0.02000 | 20.0 | 20 | 6 | 3.760 | 0.351 |                 |      |
|          | 0.02000 | 30.0 | 20 | 6 | 6.710 | 0.041 |                 |      |
| Nisin    | 0.00500 | 1.0  | 4  | 6 | 2.605 | 0.065 | broccoli        | (30) |
|          | 0.00500 | 1.0  | 4  | 6 | 2.865 | 0.086 | cabbage         |      |
|          | 0.00500 | 1.0  | 4  | 6 | 1.235 | 0.099 | mungbeansprouts |      |
| OW       | 0.00050 | 3.0  | 23 | 3 | 1.400 | 0.212 | spinach         | (6)  |
| PAA      | 0.00250 | 1.5  | 25 | 6 | 1.100 | 0.037 | mungbeansprouts | (22) |
|          | 0.00250 | 3.0  | 25 | 6 | 1.500 | 0.102 |                 |      |
|          | 0.00510 | 1.5  | 25 | 6 | 1.200 | 0.114 |                 |      |
|          | 0.00510 | 3.0  | 25 | 6 | 1.700 | 0.057 |                 |      |
|          | 0.00700 | 1.5  | 25 | 6 | 1.500 | 0.139 |                 |      |
|          | 0.00700 | 3.0  | 25 | 6 | 1.800 | 0.163 |                 |      |
|          | 0.00700 | 3.0  | 25 | 3 | 1.800 | 0.231 |                 |      |
|          | 0.00400 | 2.0  | 22 | 3 | 0.800 | 0.224 | carrot          | (3)  |
|          | 0.00400 | 2.0  | 22 | 3 | 0.600 | 0.085 |                 |      |
|          | 0.00400 | 2.0  | 22 | 3 | 0.500 | 0.200 |                 |      |
|          | 0.00400 | 2.0  | 22 | 3 | 0.300 | 0.206 |                 |      |
| Pediocin | 4.80000 | 1.0  | 4  | 6 | 1.420 | 0.067 | broccoli        | (30) |
|          | 4.80000 | 1.0  | 4  | 6 | 2.095 | 0.115 | cabbage         |      |
|          | 4.80000 | 1.0  | 4  | 6 | 1.480 | 0.107 | mungbeansprouts |      |
| SAEW     | 0.00215 | 3.0  | 23 | 6 | 1.190 | 0.033 | chinesecabbage  | (19) |
|          | 0.00215 | 3.0  | 23 | 6 | 1.170 | 0.060 |                 |      |
|          | 0.00215 | 3.0  | 23 | 6 | 1.200 | 0.098 | lettuce         |      |
|          | 0.00215 | 3.0  | 23 | 6 | 1.400 | 0.140 |                 |      |

|       |         |      |    |   |       |       |                 |      |
|-------|---------|------|----|---|-------|-------|-----------------|------|
|       | 0.00215 | 3.0  | 23 | 6 | 1.310 | 0.114 | sesameleaf      |      |
|       | 0.00215 | 3.0  | 23 | 6 | 1.300 | 0.120 |                 |      |
|       | 0.00215 | 3.0  | 23 | 6 | 1.480 | 0.135 | spinach         |      |
|       | 0.00215 | 3.0  | 23 | 6 | 1.400 | 0.150 |                 |      |
|       | 0.00050 | 3.0  | 23 | 3 | 2.800 | 0.250 | spinach         | (6)  |
|       | 0.00500 | 3.0  | 23 | 3 | 2.700 | 0.335 |                 |      |
| SH    | 0.02000 | 1.0  | 25 | 4 | 1.488 | NR    | cucumber        | (32) |
|       | 0.01000 | 5.0  | 20 | 6 | 1.750 | 0.122 | carrot          | (27) |
|       | 0.01000 | 10.0 | 20 | 6 | 1.900 | 0.249 |                 |      |
|       | 0.01000 | 5.0  | 20 | 6 | 1.340 | 0.053 | cherrytomato    |      |
|       | 0.01000 | 10.0 | 20 | 6 | 1.760 | 0.110 |                 |      |
|       | 0.01000 | 5.0  | 20 | 6 | 1.090 | 0.049 | cucumber        |      |
|       | 0.01000 | 10.0 | 20 | 6 | 1.880 | 0.212 |                 |      |
|       | 0.01060 | 1.5  | 25 | 6 | 0.750 | 0.159 | mungbeansprouts | (22) |
|       | 0.01060 | 3.0  | 25 | 6 | 0.800 | 0.245 |                 |      |
|       | 0.01300 | 1.5  | 25 | 6 | 0.730 | 0.196 |                 |      |
|       | 0.01300 | 3.0  | 25 | 6 | 1.200 | 0.122 |                 |      |
|       | 0.01700 | 1.5  | 25 | 6 | 0.760 | 0.212 |                 |      |
|       | 0.01700 | 3.0  | 25 | 6 | 1.300 | 0.106 |                 |      |
|       | 0.01700 | 3.0  | 25 | 3 | 1.300 | 0.173 |                 |      |
|       | 0.01000 | 3.0  | 23 | 3 | 2.100 | 0.250 | spinach         | (6)  |
|       | 0.02000 | 2.0  | 22 | 3 | 2.200 | 0.172 | carrot          | (3)  |
|       | 0.02000 | 2.0  | 22 | 3 | 1.100 | 0.106 |                 |      |
|       | 0.02000 | 2.0  | 22 | 3 | 2.300 | 0.206 |                 |      |
|       | 0.02000 | 2.0  | 22 | 3 | 1.500 | 0.224 |                 |      |
|       | 0.02000 | 0.5  | 25 | 4 | 0.780 | 0.200 | lettuce         | (29) |
|       | 0.02000 | 1.0  | 25 | 4 | 0.940 | 0.065 |                 |      |
| TSP   | 0.02000 | 0.5  | 25 | 4 | 0.000 | 0.250 | lettuce         | (29) |
|       | 0.02000 | 1.0  | 25 | 4 | 0.020 | 0.150 |                 |      |
|       | 0.05000 | 0.5  | 25 | 4 | 0.000 | 0.150 |                 |      |
|       | 0.05000 | 1.0  | 25 | 4 | 0.100 | 0.050 |                 |      |
| Water | 0.00000 | 1.0  | 80 | 4 | 1.990 | NR    | cucumber        | (32) |
|       | 0.00000 | 2.0  | 22 | 3 | 0.100 | 0.128 | carrot          | (3)  |
|       | 0.00000 | 2.0  | 22 | 3 | 0.100 | 0.113 |                 |      |
|       | 0.00000 | 2.0  | 22 | 3 | 0.000 | 0.361 |                 |      |
|       | 0.00000 | 2.0  | 22 | 3 | 0.000 | 0.224 |                 |      |

NR: Not reported in the respective primary study

Table 3. Meta-analytical data of the mean reduction of *Salmonella* spp. counts produced by washing fresh produce with sanitizing agents, along with extracted study characteristics of sanitizer concentration, washing time and temperature, type of food, and sample size N used to estimate a single log-reduction value and its standard error

| Sanitizer | Concent (%) | Time (min) | Temp (°C) | N     | Reduction (log CFU/g) | St. Error (log CFU/g) | Food         | Source |
|-----------|-------------|------------|-----------|-------|-----------------------|-----------------------|--------------|--------|
| AA        | 0.00500     | 5.0        | 21        | 9     | 1.900                 | 0.090                 | blueberry    | (33)   |
|           | 0.05000     | 1.0        | 21        | 9     | 2.100                 | 0.060                 |              |        |
|           | 0.05000     | 5.0        | 21        | 9     | 2.200                 | 0.126                 |              |        |
|           | 0.05000     | 5.0        | 21        | 9     | 2.400                 | 0.124                 |              |        |
|           | 0.03950     | 0.2        | 23        | 6     | 1.320                 | 0.286                 | rocketleaves | (34)   |
|           | 0.03950     | 0.2        | 23        | 6     | 2.500                 | 0.793                 |              |        |
|           | 0.03950     | 15.0       | 23        | 6     | 2.200                 | 0.267                 |              |        |
|           | 0.03950     | 15.0       | 23        | 6     | 2.100                 | 0.531                 |              |        |
|           | 0.03950     | 30.0       | 23        | 6     | 2.810                 | 0.150                 |              |        |
|           | 0.03950     | 30.0       | 23        | 6     | 2.890                 | 0.732                 |              |        |
|           | 0.03950     | 60.0       | 23        | 6     | 2.490                 | 0.205                 |              |        |
|           | 0.03950     | 60.0       | 23        | 6     | 3.120                 | 0.901                 |              |        |
|           | 0.03950     | 0.2        | 23        | 6     | 0.930                 | 0.168                 |              |        |
|           | 0.03950     | 0.2        | 23        | 6     | 0.920                 | 0.547                 |              |        |
|           | 0.03950     | 15.0       | 23        | 6     | 1.190                 | 0.214                 |              |        |
|           | 0.03950     | 15.0       | 23        | 6     | 0.970                 | 0.629                 |              |        |
| 0.03950   | 30.0        | 23         | 6         | 1.340 | 0.296                 |                       |              |        |
| 0.03950   | 30.0        | 23         | 6         | 1.280 | 0.877                 |                       |              |        |
| 0.03950   | 60.0        | 23         | 6         | 2.100 | 0.217                 |                       |              |        |
| 0.03950   | 60.0        | 23         | 6         | 2.920 | 0.843                 |                       |              |        |
| ASC       | 0.05000     | 10.0       | 20        | 6     | 2.600                 | 0.041                 | carrot       | (27)   |
|           | 0.05000     | 10.0       | 20        | 6     | 3.660                 | 0.102                 | cherrytomato |        |
|           | 0.05000     | 10.0       | 20        | 6     | 3.060                 | 0.024                 | cucumber     |        |
|           | 0.01000     | 1.0        | 22        | 3     | 5.500                 | 0.156                 | carrot       | (3)    |
|           | 0.01000     | 1.0        | 22        | 3     | 5.400                 | 0.120                 |              |        |
|           | 0.12000     | 1.0        | 35        | 3     | 3.310                 | 0.184                 | tomato       | (37)   |
|           | 0.12000     | 1.0        | 35        | 3     | 1.100                 | 0.178                 |              |        |
|           | 0.12000     | 1.0        | 35        | 3     | 4.310                 | 0.202                 |              |        |
|           | 0.12000     | 2.0        | 35        | 3     | 3.720                 | 0.273                 |              |        |
|           | 0.12000     | 2.0        | 35        | 3     | 1.640                 | 0.312                 |              |        |
| 0.12000   | 2.0         | 35         | 3         | 4.310 | 0.202                 |                       |              |        |
| CA        | 0.00500     | 5.0        | 21        | 9     | 1.900                 | 0.104                 | blueberry    | (33)   |
|           | 0.05000     | 5.0        | 21        | 9     | 2.200                 | 0.149                 |              |        |
|           | 0.00300     | 5.0        | 20        | 6     | 0.870                 | 0.155                 | lettuce      | (7)    |
|           | 0.00300     | 10.0       | 20        | 6     | 1.360                 | 0.188                 |              |        |
|           | 0.00300     | 20.0       | 20        | 6     | 2.050                 | 0.127                 |              |        |
|           | 0.00300     | 30.0       | 20        | 6     | 2.280                 | 0.090                 |              |        |
|           | 0.00500     | 5.0        | 20        | 6     | 1.070                 | 0.094                 |              |        |
|           | 0.00500     | 10.0       | 20        | 6     | 1.550                 | 0.098                 |              |        |
|           | 0.00500     | 20.0       | 20        | 6     | 2.190                 | 0.041                 |              |        |
| 0.00500   | 30.0        | 20         | 6         | 2.330 | 0.192                 |                       |              |        |

|    |         |       |    |    |       |       |              |      |
|----|---------|-------|----|----|-------|-------|--------------|------|
|    | 0.00700 | 5.0   | 20 | 6  | 1.360 | 0.114 |              |      |
|    | 0.00700 | 10.0  | 20 | 6  | 1.890 | 0.339 |              |      |
|    | 0.00700 | 20.0  | 20 | 6  | 2.340 | 0.106 |              |      |
|    | 0.00700 | 30.0  | 20 | 6  | 2.510 | 0.343 |              |      |
|    | 0.01000 | 5.0   | 20 | 6  | 1.770 | 0.171 |              |      |
|    | 0.01000 | 10.0  | 20 | 6  | 1.920 | 0.073 |              |      |
|    | 0.01000 | 20.0  | 20 | 6  | 2.510 | 0.122 |              |      |
|    | 0.01000 | 30.0  | 20 | 6  | 2.790 | 0.274 |              |      |
|    | 0.02000 | 5.0   | 20 | 6  | 1.810 | 0.143 |              |      |
|    | 0.02000 | 10.0  | 20 | 6  | 2.350 | 0.180 |              |      |
|    | 0.02000 | 20.0  | 20 | 6  | 2.620 | 0.143 |              |      |
|    | 0.02000 | 30.0  | 20 | 6  | 2.940 | 0.204 |              |      |
|    | 0.04200 | 0.2   | 23 | 6  | 1.870 | 0.537 | rocketleaves | (34) |
|    | 0.04200 | 0.2   | 23 | 6  | 1.230 | 0.561 |              |      |
|    | 0.04200 | 15.0  | 23 | 6  | 2.950 | 0.549 |              |      |
|    | 0.04200 | 15.0  | 23 | 6  | 3.170 | 0.483 |              |      |
|    | 0.04200 | 30.0  | 23 | 6  | 3.520 | 0.709 |              |      |
|    | 0.04200 | 30.0  | 23 | 6  | 2.750 | 0.705 |              |      |
|    | 0.04200 | 60.0  | 23 | 6  | 2.470 | 0.545 |              |      |
|    | 0.04200 | 60.0  | 23 | 6  | 4.170 | 0.294 |              |      |
|    | 0.04200 | 0.2   | 23 | 6  | 1.430 | 0.276 | springonion  |      |
|    | 0.04200 | 0.2   | 23 | 6  | 0.870 | 0.288 |              |      |
|    | 0.04200 | 15.0  | 23 | 6  | 1.700 | 0.259 |              |      |
|    | 0.04200 | 15.0  | 23 | 6  | 1.620 | 0.290 |              |      |
|    | 0.04200 | 30.0  | 23 | 6  | 1.900 | 0.234 |              |      |
|    | 0.04200 | 30.0  | 23 | 6  | 1.690 | 0.254 |              |      |
|    | 0.04200 | 60.0  | 23 | 6  | 2.860 | 0.284 |              |      |
|    | 0.04200 | 60.0  | 23 | 6  | 2.930 | 0.248 |              |      |
| CH | 0.02000 | 0.5   | 25 | 6  | 0.700 | NR    | spinach      | (10) |
| CD | 0.00050 | 0.1   | 25 | 15 | 1.900 | 0.181 | tomato       | (35) |
|    | 0.00050 | 0.3   | 25 | 15 | 3.500 | 0.181 |              |      |
|    | 0.00050 | 0.5   | 25 | 15 | 3.900 | 0.077 |              |      |
|    | 0.00050 | 1.0   | 25 | 15 | 4.900 | 0.077 |              |      |
|    | 0.00043 | 30.0  | 22 | 6  | 4.300 | NR    | lettuce      | (12) |
|    | 0.00067 | 60.0  | 22 | 6  | 5.300 | NR    |              |      |
|    | 0.00087 | 180.0 | 22 | 6  | 5.400 | NR    |              |      |
|    | 0.00005 | 2.0   | 22 | 6  | 0.600 | NR    | strawberry   | (13) |
|    | 0.00005 | 10.0  | 22 | 6  | 2.700 | NR    |              |      |
|    | 0.00015 | 10.0  | 22 | 6  | 3.000 | NR    |              |      |
|    | 0.00030 | 10.0  | 22 | 6  | 4.000 | NR    |              |      |
|    | 0.00050 | 2.0   | 22 | 6  | 1.900 | NR    |              |      |
|    | 0.00050 | 10.0  | 22 | 6  | 4.300 | NR    |              |      |
|    | 0.00005 | 2.0   | 22 | 6  | 0.900 | NR    | cantaloupe   | (28) |
|    | 0.00005 | 10.0  | 22 | 6  | 3.200 | NR    |              |      |
|    | 0.00010 | 2.0   | 22 | 6  | 1.200 | NR    |              |      |
|    | 0.00010 | 10.0  | 22 | 6  | 3.500 | NR    |              |      |
|    | 0.00015 | 2.0   | 22 | 6  | 1.500 | NR    |              |      |
|    | 0.00015 | 10.0  | 22 | 6  | 4.700 | NR    |              |      |



|         |      |    |   |       |       |         |      |
|---------|------|----|---|-------|-------|---------|------|
| 0.00030 | 2.0  | 22 | 6 | 3.200 | NR    |         |      |
| 0.00030 | 10.0 | 22 | 6 | 5.000 | NR    |         |      |
| 0.00050 | 2.0  | 22 | 6 | 3.200 | NR    |         |      |
| 0.00012 | 30.0 | 25 | 6 | 0.300 | NR    | spinach | (10) |
| 0.00021 | 60.0 | 25 | 6 | 0.600 | NR    |         |      |
| 0.00014 | 6.0  | 22 | 9 | 3.210 | NR    | apple   | (14) |
| 0.00027 | 12.0 | 22 | 9 | 4.210 | NR    |         |      |
| 0.00041 | 25.0 | 22 | 9 | 4.210 | NR    |         |      |
| 0.00014 | 6.4  | 22 | 9 | 1.240 | NR    | cabbage |      |
| 0.00027 | 12.3 | 22 | 9 | 1.890 | NR    |         |      |
| 0.00041 | 20.5 | 22 | 9 | 4.420 | NR    |         |      |
| 0.00014 | 6.4  | 22 | 9 | 2.150 | NR    | carrot  |      |
| 0.00027 | 12.3 | 22 | 9 | 3.110 | NR    |         |      |
| 0.00041 | 20.5 | 22 | 9 | 5.150 | NR    |         |      |
| 0.00014 | 6.4  | 22 | 9 | 1.140 | NR    | lettuce |      |
| 0.00027 | 12.3 | 22 | 9 | 1.210 | NR    |         |      |
| 0.00041 | 20.5 | 22 | 9 | 1.580 | NR    |         |      |
| 0.00014 | 5.4  | 22 | 9 | 0.830 | NR    | onion   |      |
| 0.00027 | 10.4 | 22 | 9 | 1.890 | NR    |         |      |
| 0.00041 | 20.0 | 22 | 9 | 1.940 | NR    |         |      |
| 0.00014 | 5.4  | 22 | 9 | 1.000 | NR    | peach   |      |
| 0.00027 | 10.4 | 22 | 9 | 1.520 | NR    |         |      |
| 0.00041 | 20.0 | 22 | 9 | 3.230 | NR    |         |      |
| 0.00014 | 6.0  | 22 | 9 | 1.110 | NR    | tomato  |      |
| 0.00027 | 12.0 | 22 | 9 | 2.040 | NR    |         |      |
| 0.00041 | 25.0 | 22 | 9 | 4.330 | NR    |         |      |
| 0.00020 | 0.2  | 25 | 3 | 0.530 | 0.098 | tomato  | (36) |
| 0.00020 | 0.5  | 25 | 3 | 0.500 | 0.098 |         |      |
| 0.00020 | 1.0  | 25 | 3 | 0.940 | 0.122 |         |      |
| 0.00020 | 2.0  | 25 | 3 | 1.250 | 0.132 |         |      |
| 0.00020 | 3.0  | 25 | 3 | 2.410 | 0.107 |         |      |
| 0.00050 | 0.2  | 25 | 3 | 1.050 | 0.122 |         |      |
| 0.00050 | 0.5  | 25 | 3 | 1.040 | 0.086 |         |      |
| 0.00050 | 1.0  | 25 | 3 | 1.770 | 0.090 |         |      |
| 0.00050 | 2.0  | 25 | 3 | 1.910 | 0.075 |         |      |
| 0.00050 | 3.0  | 25 | 3 | 2.430 | 0.072 |         |      |
| 0.00080 | 0.2  | 25 | 3 | 1.080 | 0.117 |         |      |
| 0.00080 | 0.5  | 25 | 3 | 2.140 | 0.117 |         |      |
| 0.00080 | 1.0  | 25 | 3 | 2.940 | 0.094 |         |      |
| 0.00080 | 2.0  | 25 | 3 | 3.380 | 0.098 |         |      |
| 0.00080 | 3.0  | 25 | 3 | 3.770 | 0.075 |         |      |
| 0.00100 | 0.2  | 25 | 3 | 2.710 | 0.075 |         |      |
| 0.00100 | 0.5  | 25 | 3 | 2.920 | 0.086 |         |      |
| 0.00100 | 1.0  | 25 | 3 | 3.190 | 0.132 |         |      |
| 0.00100 | 2.0  | 25 | 3 | 3.860 | 0.094 |         |      |
| 0.00100 | 3.0  | 25 | 3 | 4.870 | 0.072 |         |      |
| 0.00041 | 60.0 | 23 | 3 | 5.630 | 0.066 | tomato  | (37) |
| 0.00041 | 60.0 | 23 | 3 | 0.820 | 0.481 |         |      |

|      |         |      |    |   |       |       |                 |      |
|------|---------|------|----|---|-------|-------|-----------------|------|
| DioW | 0.00000 | 1.0  | 21 | 9 | 1.300 | 0.071 | blueberry       | (33) |
|      | 0.00000 | 5.0  | 21 | 9 | 1.300 | 0.106 |                 |      |
|      | 0.00000 | 0.3  | 25 | 4 | 0.000 | 0.000 | lettuce         | (29) |
|      | 0.00000 | 0.5  | 25 | 4 | 0.000 | 0.000 |                 |      |
|      | 0.00000 | 0.3  | 25 | 4 | 0.000 | 0.000 | pepper          |      |
|      | 0.00000 | 0.5  | 25 | 4 | 0.000 | 0.000 |                 |      |
|      | 0.00000 | 3.0  | 20 | 3 | 0.270 | 0.199 | mungbean        | (17) |
|      | 0.00000 | 5.0  | 20 | 3 | 0.250 | 0.152 |                 |      |
|      | 0.00000 | 10.0 | 20 | 3 | 0.350 | 0.129 |                 |      |
|      | 0.00000 | 15.0 | 20 | 3 | 0.360 | 0.135 |                 |      |
|      | 0.00000 | 3.0  | 20 | 3 | 0.340 | 0.415 | mungbeansprouts |      |
|      | 0.00000 | 5.0  | 20 | 3 | 0.320 | 0.243 |                 |      |
|      | 0.00000 | 10.0 | 20 | 3 | 0.280 | 0.305 |                 |      |
|      | 0.00000 | 15.0 | 20 | 3 | 0.260 | 0.234 |                 |      |
| DisW | 0.00000 | 5.0  | 15 | 3 | 0.600 | 0.129 | buckwheat       | (18) |
|      | 0.00000 | 2.0  | 55 | 9 | 0.070 | NR    | apple           | (38) |
|      | 0.00000 | 5.0  | 21 | 9 | 1.150 | 0.224 | blueberry       | (33) |
|      | 0.00000 | 5.0  | 21 | 9 | 1.200 | 0.097 |                 |      |
|      | 0.00000 | 5.0  | 21 | 9 | 1.100 | 0.094 |                 |      |
|      | 0.00000 | 0.3  | 25 | 6 | 0.700 | NR    | spinach         | (10) |
|      | 0.00000 | 1.5  | 25 | 6 | 0.370 | 0.020 | mungbeansprouts | (22) |
|      | 0.00000 | 3.0  | 25 | 6 | 0.500 | 0.041 |                 |      |
|      | 0.00000 | 5.0  | 20 | 6 | 0.430 | 0.086 | lettuce         | (7)  |
|      | 0.00000 | 5.0  | 22 | 6 | 0.700 | NR    | apple           | (24) |
|      | 0.00000 | 5.0  | 22 | 6 | 0.400 | NR    |                 |      |
|      | 0.00000 | 4.0  | 22 | 6 | 0.250 | 0.130 | cucumber        | (31) |
|      | 0.00000 | 4.0  | 22 | 6 | 0.220 | 0.119 |                 |      |
|      | 0.00000 | 4.0  | 22 | 6 | 0.260 | 0.120 |                 |      |
| HP   | 0.00500 | 5.0  | 21 | 9 | 2.300 | 0.214 | blueberry       | (33) |
|      | 0.01000 | 5.0  | 21 | 9 | 2.200 | 0.207 |                 |      |
|      | 0.02000 | 1.0  | 21 | 9 | 2.200 | 0.104 |                 |      |
|      | 0.02000 | 5.0  | 21 | 9 | 2.700 | 0.160 |                 |      |
|      | 0.02000 | 5.0  | 21 | 9 | 2.800 | 0.155 |                 |      |
|      | 0.02500 | 5.0  | 25 | 6 | 2.520 | 0.052 | cantaloupe      | (39) |
|      | 0.05000 | 5.0  | 25 | 6 | 2.290 | 0.069 |                 |      |
|      | 0.02500 | 5.0  | 25 | 6 | 3.130 | 0.057 | honeydew        |      |
|      | 0.05000 | 5.0  | 25 | 6 | 3.130 | 0.057 |                 |      |
| LA   | 0.00500 | 5.0  | 21 | 9 | 1.900 | 0.083 | blueberry       | (33) |
|      | 0.05000 | 5.0  | 21 | 9 | 2.400 | 0.126 |                 |      |
|      | 0.02000 | 0.5  | 55 | 6 | 2.300 | NR    | spinach         | (10) |
|      | 0.00300 | 5.0  | 20 | 6 | 0.700 | 0.082 | lettuce         | (7)  |
|      | 0.00300 | 10.0 | 20 | 6 | 0.720 | 0.053 |                 |      |
|      | 0.00300 | 20.0 | 20 | 6 | 1.460 | 0.122 |                 |      |
|      | 0.00300 | 30.0 | 20 | 6 | 2.080 | 0.094 |                 |      |
|      | 0.00500 | 5.0  | 20 | 6 | 0.910 | 0.135 |                 |      |
|      | 0.00500 | 10.0 | 20 | 6 | 1.200 | 0.339 |                 |      |
|      | 0.00500 | 20.0 | 20 | 6 | 1.540 | 0.057 |                 |      |

|     |         |      |    |    |       |       |            |      |
|-----|---------|------|----|----|-------|-------|------------|------|
|     | 0.00500 | 30.0 | 20 | 6  | 2.210 | 0.176 |            |      |
|     | 0.00700 | 5.0  | 20 | 6  | 1.080 | 0.045 |            |      |
|     | 0.00700 | 10.0 | 20 | 6  | 1.500 | 0.318 |            |      |
|     | 0.00700 | 20.0 | 20 | 6  | 1.620 | 0.082 |            |      |
|     | 0.00700 | 30.0 | 20 | 6  | 2.490 | 0.220 |            |      |
|     | 0.01000 | 5.0  | 20 | 6  | 1.390 | 0.151 |            |      |
|     | 0.01000 | 10.0 | 20 | 6  | 1.760 | 0.441 |            |      |
|     | 0.01000 | 20.0 | 20 | 6  | 2.060 | 0.343 |            |      |
|     | 0.01000 | 30.0 | 20 | 6  | 2.670 | 0.171 |            |      |
|     | 0.02000 | 5.0  | 20 | 6  | 1.730 | 0.065 |            |      |
|     | 0.02000 | 10.0 | 20 | 6  | 2.020 | 0.318 |            |      |
|     | 0.02000 | 20.0 | 20 | 6  | 2.270 | 0.098 |            |      |
|     | 0.02000 | 30.0 | 20 | 6  | 3.420 | 0.355 |            |      |
|     | 0.02000 | 5.0  | 22 | 6  | 2.300 | NR    | apple      | (24) |
|     | 0.02000 | 5.0  | 22 | 6  | 2.650 | NR    |            |      |
| MA  | 0.00300 | 5.0  | 20 | 6  | 0.550 | 0.078 | lettuce    | (7)  |
|     | 0.00300 | 10.0 | 20 | 6  | 1.110 | 0.049 |            |      |
|     | 0.00300 | 20.0 | 20 | 6  | 1.280 | 0.061 |            |      |
|     | 0.00300 | 30.0 | 20 | 6  | 1.620 | 0.106 |            |      |
|     | 0.00500 | 5.0  | 20 | 6  | 1.100 | 0.127 |            |      |
|     | 0.00500 | 10.0 | 20 | 6  | 1.160 | 0.114 |            |      |
|     | 0.00500 | 20.0 | 20 | 6  | 1.860 | 0.155 |            |      |
|     | 0.00500 | 30.0 | 20 | 6  | 2.390 | 0.237 |            |      |
|     | 0.00700 | 5.0  | 20 | 6  | 1.490 | 0.171 |            |      |
|     | 0.00700 | 10.0 | 20 | 6  | 1.580 | 0.057 |            |      |
|     | 0.00700 | 20.0 | 20 | 6  | 1.950 | 0.143 |            |      |
|     | 0.00700 | 30.0 | 20 | 6  | 2.800 | 0.298 |            |      |
|     | 0.01000 | 5.0  | 20 | 6  | 1.730 | 0.176 |            |      |
|     | 0.01000 | 10.0 | 20 | 6  | 1.690 | 0.041 |            |      |
|     | 0.01000 | 20.0 | 20 | 6  | 2.530 | 0.351 |            |      |
|     | 0.01000 | 30.0 | 20 | 6  | 3.420 | 0.159 |            |      |
|     | 0.02000 | 5.0  | 20 | 6  | 1.750 | 0.135 |            |      |
|     | 0.02000 | 10.0 | 20 | 6  | 2.030 | 0.106 |            |      |
|     | 0.02000 | 20.0 | 20 | 6  | 2.790 | 0.053 |            |      |
|     | 0.02000 | 30.0 | 20 | 6  | 4.500 | 0.253 |            |      |
| OW  | 0.00010 | 15.0 | 12 | 6  | 0.900 | NR    | spinach    | (10) |
|     | 0.00010 | 30.0 | 12 | 6  | 1.000 | NR    |            |      |
| PAA | 0.00800 | 0.1  | 25 | 15 | 2.800 | 0.232 | tomato     | (35) |
|     | 0.00800 | 0.3  | 25 | 15 | 4.700 | 0.129 |            |      |
|     | 0.00800 | 0.5  | 25 | 15 | 5.500 | 0.026 |            |      |
|     | 0.00800 | 1.0  | 25 | 15 | 5.500 | 0.026 |            |      |
|     | 0.00400 | 5.0  | 25 | 30 | 0.150 | 0.100 | greenonion | (40) |
|     | 0.00400 | 10.0 | 25 | 30 | 0.540 | 0.079 |            |      |
|     | 0.00800 | 5.0  | 25 | 30 | 0.540 | 0.162 |            |      |
|     | 0.00800 | 10.0 | 25 | 30 | 0.630 | 0.161 |            |      |
|     | 0.00400 | 5.0  | 25 | 30 | 0.990 | 0.248 | lettuce    |      |
|     | 0.00400 | 10.0 | 25 | 30 | 0.890 | 0.263 |            |      |
|     | 0.00800 | 5.0  | 25 | 30 | 0.450 | 0.246 |            |      |

|      |         |      |    |    |       |       |                 |      |
|------|---------|------|----|----|-------|-------|-----------------|------|
|      | 0.00800 | 10.0 | 25 | 30 | 0.950 | 0.268 |                 |      |
|      | 0.00800 | 0.5  | 25 | 6  | 0.800 | NR    | spinach         | (10) |
|      | 0.00250 | 1.5  | 25 | 6  | 1.000 | 0.029 | mungbeansprouts | (22) |
|      | 0.00250 | 3.0  | 25 | 6  | 1.200 | 0.012 |                 |      |
|      | 0.00510 | 1.5  | 25 | 6  | 1.700 | 0.004 |                 |      |
|      | 0.00510 | 3.0  | 25 | 6  | 1.750 | 0.012 |                 |      |
|      | 0.00700 | 1.5  | 25 | 6  | 1.760 | 0.012 |                 |      |
|      | 0.00700 | 3.0  | 25 | 6  | 2.000 | 0.016 |                 |      |
|      | 0.00700 | 3.0  | 25 | 3  | 2.100 | 0.058 |                 |      |
|      | 0.00400 | 2.0  | 22 | 3  | 2.350 | 0.180 | carrot          | (3)  |
|      | 0.00400 | 2.0  | 22 | 3  | 2.100 | 0.078 |                 |      |
|      | 0.00400 | 2.0  | 22 | 3  | 1.300 | 0.130 |                 |      |
|      | 0.00400 | 2.0  | 22 | 3  | 0.800 | 0.130 |                 |      |
|      | 0.00870 | 1.0  | 35 | 3  | 2.120 | 0.222 | tomato          | (37) |
|      | 0.00870 | 1.0  | 35 | 3  | 1.170 | 0.094 |                 |      |
|      | 0.00870 | 2.0  | 35 | 3  | 2.720 | 0.266 |                 |      |
|      | 0.00870 | 2.0  | 35 | 3  | 1.180 | 0.279 |                 |      |
| SAEW | 0.00214 | 5.0  | 20 | 16 | 2.870 | 0.010 | chinese celery  | (26) |
|      | 0.00214 | 5.0  | 20 | 16 | 2.910 | 0.013 | daikon          |      |
|      | 0.00214 | 5.0  | 20 | 16 | 2.910 | 0.013 | lettuce         |      |
|      | 0.00200 | 3.0  | 20 | 3  | 1.550 | 0.238 | mungbean        | (17) |
|      | 0.00200 | 5.0  | 20 | 3  | 1.740 | 0.248 |                 |      |
|      | 0.00200 | 10.0 | 20 | 3  | 1.760 | 0.147 |                 |      |
|      | 0.00200 | 15.0 | 20 | 3  | 1.800 | 0.274 |                 |      |
|      | 0.00400 | 3.0  | 20 | 3  | 2.230 | 0.259 |                 |      |
|      | 0.00400 | 5.0  | 20 | 3  | 2.580 | 0.215 |                 |      |
|      | 0.00400 | 10.0 | 20 | 3  | 2.610 | 0.274 |                 |      |
|      | 0.00400 | 15.0 | 20 | 3  | 2.850 | 0.244 |                 |      |
|      | 0.00600 | 3.0  | 20 | 3  | 3.150 | 0.463 |                 |      |
|      | 0.00600 | 5.0  | 20 | 3  | 3.160 | 0.320 |                 |      |
|      | 0.00600 | 10.0 | 20 | 3  | 3.220 | 0.350 |                 |      |
|      | 0.00600 | 15.0 | 20 | 3  | 3.360 | 0.266 |                 |      |
|      | 0.00800 | 3.0  | 20 | 3  | 3.700 | 0.230 |                 |      |
|      | 0.00800 | 5.0  | 20 | 3  | 3.960 | 0.287 |                 |      |
|      | 0.00800 | 10.0 | 20 | 3  | 3.980 | 0.336 |                 |      |
|      | 0.00800 | 15.0 | 20 | 3  | 4.190 | 0.172 |                 |      |
|      | 0.00200 | 3.0  | 20 | 3  | 1.270 | 0.463 | mungbeansprouts |      |
|      | 0.00200 | 5.0  | 20 | 3  | 1.310 | 0.380 |                 |      |
|      | 0.00200 | 10.0 | 20 | 3  | 1.460 | 0.490 |                 |      |
|      | 0.00200 | 15.0 | 20 | 3  | 1.520 | 0.325 |                 |      |
|      | 0.00400 | 3.0  | 20 | 3  | 2.010 | 0.498 |                 |      |
|      | 0.00400 | 5.0  | 20 | 3  | 2.130 | 0.288 |                 |      |
|      | 0.00400 | 10.0 | 20 | 3  | 2.170 | 0.308 |                 |      |
|      | 0.00400 | 15.0 | 20 | 3  | 2.230 | 0.466 |                 |      |
|      | 0.00800 | 3.0  | 20 | 3  | 3.120 | 0.325 |                 |      |
|      | 0.00800 | 5.0  | 20 | 3  | 3.280 | 0.220 |                 |      |
|      | 0.00800 | 10.0 | 20 | 3  | 3.220 | 0.385 |                 |      |
|      | 0.00800 | 15.0 | 20 | 3  | 3.230 | 0.391 |                 |      |

|     |         |      |    |    |       |       |               |      |
|-----|---------|------|----|----|-------|-------|---------------|------|
|     | 0.01200 | 3.0  | 20 | 3  | 4.030 | 0.396 |               |      |
|     | 0.01200 | 5.0  | 20 | 3  | 4.230 | 0.386 |               |      |
|     | 0.01200 | 10.0 | 20 | 3  | 4.090 | 0.450 |               |      |
|     | 0.01200 | 15.0 | 20 | 3  | 4.110 | 0.363 |               |      |
| SDS | 0.00500 | 5.0  | 21 | 9  | 1.850 | 0.151 | blueberry     | (33) |
|     | 0.00500 | 5.0  | 21 | 9  | 2.000 | 0.149 |               |      |
|     | 0.00500 | 5.0  | 21 | 9  | 2.100 | 0.149 |               |      |
|     | 0.05000 | 5.0  | 21 | 9  | 2.050 | 0.192 |               |      |
|     | 0.05000 | 5.0  | 21 | 9  | 2.200 | 0.192 |               |      |
|     | 0.05000 | 5.0  | 21 | 9  | 2.200 | 0.186 |               |      |
|     | 0.50000 | 1.0  | 21 | 9  | 2.300 | 0.073 |               |      |
|     | 0.50000 | 5.0  | 21 | 9  | 2.150 | 0.183 |               |      |
|     | 0.50000 | 5.0  | 21 | 9  | 2.250 | 0.186 |               |      |
|     | 0.50000 | 5.0  | 21 | 9  | 2.300 | 0.180 |               |      |
|     | 0.50000 | 5.0  | 21 | 9  | 2.500 | 0.194 |               |      |
| SH  | 0.00250 | 0.1  | 25 | 15 | 1.000 | 0.052 | tomato        | (35) |
|     | 0.00250 | 0.3  | 25 | 15 | 2.000 | 0.026 |               |      |
|     | 0.00250 | 0.5  | 25 | 15 | 2.500 | 0.181 |               |      |
|     | 0.00250 | 1.0  | 25 | 15 | 4.200 | 0.284 |               |      |
|     | 0.00500 | 0.1  | 25 | 15 | 1.400 | 0.207 |               |      |
|     | 0.00500 | 0.3  | 25 | 15 | 2.800 | 0.284 |               |      |
|     | 0.00500 | 0.5  | 25 | 15 | 4.200 | 0.207 |               |      |
|     | 0.00500 | 1.0  | 25 | 15 | 5.000 | 0.310 |               |      |
|     | 0.01000 | 0.1  | 25 | 15 | 1.700 | 0.129 |               |      |
|     | 0.01000 | 0.1  | 25 | 15 | 1.900 | 0.155 |               |      |
|     | 0.01000 | 0.3  | 25 | 15 | 4.000 | 0.465 |               |      |
|     | 0.01000 | 0.3  | 25 | 15 | 3.500 | 0.284 |               |      |
|     | 0.01000 | 0.5  | 25 | 15 | 5.600 | 0.103 |               |      |
|     | 0.01000 | 0.5  | 25 | 15 | 4.100 | 0.310 |               |      |
|     | 0.01000 | 1.0  | 25 | 15 | 5.500 | 0.258 |               |      |
|     | 0.01000 | 1.0  | 25 | 15 | 5.500 | 0.052 |               |      |
|     | 0.01000 | 5.0  | 25 | 30 | 0.140 | 0.079 | greenonion    | (40) |
|     | 0.01000 | 10.0 | 25 | 30 | 0.060 | 0.086 |               |      |
|     | 0.02000 | 5.0  | 25 | 30 | 0.070 | 0.159 |               |      |
|     | 0.02000 | 10.0 | 25 | 30 | 0.170 | 0.179 |               |      |
|     | 0.01000 | 5.0  | 25 | 30 | 0.430 | 0.197 | lettuce       |      |
|     | 0.01000 | 10.0 | 25 | 30 | 0.880 | 0.226 |               |      |
|     | 0.02000 | 5.0  | 25 | 30 | 0.920 | 0.183 |               |      |
|     | 0.02000 | 10.0 | 25 | 30 | 0.990 | 0.252 |               |      |
|     | 0.01000 | 5.0  | 20 | 16 | 2.820 | 0.013 | chinesecelery | (26) |
|     | 0.01000 | 5.0  | 20 | 16 | 2.860 | 0.008 | daikon        |      |
|     | 0.01000 | 5.0  | 20 | 16 | 2.950 | 0.010 | lettuce       |      |
|     | 0.01000 | 5.0  | 20 | 6  | 2.000 | 0.069 | carrot        | (27) |
|     | 0.01000 | 10.0 | 20 | 6  | 3.250 | 0.122 |               |      |
|     | 0.01000 | 5.0  | 20 | 6  | 2.040 | 0.159 | cherrytomato  |      |
|     | 0.01000 | 10.0 | 20 | 6  | 2.780 | 0.045 |               |      |
|     | 0.01000 | 5.0  | 20 | 6  | 2.070 | 0.131 | cucumber      |      |
|     | 0.01000 | 10.0 | 20 | 6  | 3.190 | 0.049 |               |      |

|       |         |     |    |    |        |       |                 |      |
|-------|---------|-----|----|----|--------|-------|-----------------|------|
|       | 0.00040 | 5.0 | 21 | 9  | 3.250  | 0.248 | blueberry       | (33) |
|       | 0.00125 | 5.0 | 21 | 9  | 2.450  | 0.254 |                 |      |
|       | 0.00250 | 5.0 | 21 | 9  | 3.150  | 0.380 |                 |      |
|       | 0.00500 | 5.0 | 21 | 9  | 3.650  | 0.269 |                 |      |
|       | 0.01000 | 5.0 | 21 | 9  | 3.750  | 0.291 |                 |      |
|       | 0.02000 | 1.0 | 21 | 9  | 4.000  | 0.305 |                 |      |
|       | 0.02000 | 5.0 | 21 | 9  | 4.600  | 0.073 |                 |      |
|       | 0.01060 | 1.5 | 25 | 6  | 1.200  | 0.024 | mungbeansprouts | (22) |
|       | 0.01060 | 3.0 | 25 | 6  | 1.500  | 0.020 |                 |      |
|       | 0.01300 | 1.5 | 25 | 6  | 1.100  | 0.147 |                 |      |
|       | 0.01300 | 3.0 | 25 | 6  | 1.200  | 0.033 |                 |      |
|       | 0.01700 | 1.5 | 25 | 6  | 1.350  | 0.139 |                 |      |
|       | 0.01700 | 3.0 | 25 | 6  | 1.500  | 0.049 |                 |      |
|       | 0.01700 | 3.0 | 25 | 3  | 1.500  | 0.058 |                 |      |
|       | 0.02000 | 2.0 | 22 | 3  | 3.360  | 0.385 | carrot          | (3)  |
|       | 0.02000 | 2.0 | 22 | 3  | 1.400  | 0.054 |                 |      |
|       | 0.02000 | 2.0 | 22 | 3  | 1.700  | 0.156 |                 |      |
|       | 0.02000 | 2.0 | 22 | 3  | 0.400  | 0.130 |                 |      |
|       | 0.02000 | 0.3 | 25 | 4  | 5.230  | 0.960 | lettuce         | (29) |
|       | 0.02000 | 0.5 | 25 | 4  | 5.570  | 0.775 |                 |      |
|       | 0.02000 | 0.3 | 25 | 4  | 5.710  | 0.310 | pepper          |      |
|       | 0.02000 | 0.5 | 25 | 4  | 6.670  | 0.000 |                 |      |
|       | 0.02000 | 1.0 | 35 | 3  | 1.650  | 0.200 | tomato          | (37) |
|       | 0.02000 | 1.0 | 35 | 3  | 1.180  | 0.103 |                 |      |
|       | 0.02000 | 2.0 | 35 | 3  | 2.530  | 0.200 |                 |      |
|       | 0.02000 | 2.0 | 35 | 3  | 1.270  | 0.086 |                 |      |
| TSP   | 0.02000 | 0.3 | 25 | 4  | 5.460  | 0.830 | lettuce         | (29) |
|       | 0.02000 | 0.5 | 25 | 4  | 5.650  | 0.740 |                 |      |
|       | 0.05000 | 0.3 | 25 | 4  | 6.900  | 0.000 |                 |      |
|       | 0.05000 | 0.5 | 25 | 4  | 6.920  | 0.000 |                 |      |
|       | 0.02000 | 0.3 | 25 | 4  | 5.780  | 0.475 | pepper          |      |
|       | 0.02000 | 0.5 | 25 | 4  | 5.440  | 0.675 |                 |      |
|       | 0.05000 | 0.3 | 25 | 4  | 6.610  | 0.000 |                 |      |
|       | 0.05000 | 0.5 | 25 | 4  | 6.670  | 0.000 |                 |      |
| Water | 0.00000 | 0.1 | 25 | 15 | 1.400  | 0.103 | tomato          | (25) |
|       | 0.00000 | 0.1 | 25 | 15 | 1.900  | 0.181 |                 |      |
|       | 0.00000 | 0.3 | 25 | 15 | 2.300  | 0.103 |                 |      |
|       | 0.00000 | 0.3 | 25 | 15 | 3.200  | 0.207 |                 |      |
|       | 0.00000 | 0.5 | 25 | 15 | 2.500  | 0.052 |                 |      |
|       | 0.00000 | 0.5 | 25 | 15 | 3.400  | 0.284 |                 |      |
|       | 0.00000 | 1.0 | 25 | 15 | 3.000  | 0.103 |                 |      |
|       | 0.00000 | 1.0 | 25 | 15 | 3.800  | 0.181 |                 |      |
|       | 0.00000 | 5.0 | 20 | 16 | 0.410  | 0.015 | chinesecelery   | (26) |
|       | 0.00000 | 5.0 | 20 | 16 | 0.380  | 0.015 | daikon          |      |
|       | 0.00000 | 5.0 | 20 | 16 | 0.470  | 0.020 | lettuce         |      |
|       | 0.00000 | 2.0 | 22 | 3  | 0.440  | 0.162 | carrot          | (3)  |
|       | 0.00000 | 2.0 | 22 | 3  | 0.200  | 0.112 |                 |      |
|       | 0.00000 | 2.0 | 22 | 3  | -0.100 | 0.192 |                 |      |

|         |     |    |   |       |       |            |      |
|---------|-----|----|---|-------|-------|------------|------|
| 0.00000 | 2.0 | 22 | 3 | 0.000 | 0.130 |            |      |
| 0.00000 | 5.0 | 25 | 6 | 0.130 | 0.082 | cantaloupe | (39) |
| 0.00000 | 5.0 | 25 | 6 | 0.460 | 0.087 | honeydew   |      |

NR: Not reported in the respective primary study

## References

- Huang Y, Chen H.** 2011. Effect of organic acids, hydrogen peroxide and mild heat on inactivation of *Escherichia coli* O157:H7 on baby spinach. *Food Control* **22**:1178–1183.
- Allende A, McEvoy J, Tao Y, Luo Y.** 2009. Antimicrobial effect of acidified sodium chlorite, sodium chlorite, sodium hypochlorite, and citric acid on *Escherichia coli* O157:H7 and natural microflora of fresh-cut cilantro. *Food Control* **20**:230–234.
- Ruiz-Cruz S, Acedo-Félix E, Díaz-Cinco M, Islas-Osuna MA, González-Aguilar GA.** 2007. Efficacy of sanitizers in reducing *Escherichia coli* O157:H7, *Salmonella* spp. and *Listeria monocytogenes* populations on fresh-cut carrots. *Food Control* **18**:1383–1390.
- Tomás-Callejas A, López-Velasco G, Artés F, Artés-Hernández F.** 2012. Acidified sodium chlorite optimisation assessment to improve quality of fresh-cut tatsoi baby leaves. *J Sci Food Agric* **92**:877–885.
- Velázquez LDC, Barbini NB, Escudero ME, Estrada CL, Guzmán AMS.** 2009. Evaluation of chlorine, benzalkonium chloride and lactic acid as sanitizers for reducing *Escherichia coli* O157:H7 and *Yersinia enterocolitica* on fresh vegetables. *Food Control* **20**:262–268.
- Rahman SME, Ding T, Oh DH.** 2010. Inactivation effect of newly developed low concentration electrolyzed water and other sanitizers against microorganisms on spinach. *Food Control* **21**:1383–1387.
- Sagong HG, Lee SY, Chang PS, Heu S, Ryu S, Choi YJ, Kang DH.** 2011. Combined effect of ultrasound and organic acids to reduce *Escherichia coli* O157:H7, *Salmonella* Typhimurium, and *Listeria monocytogenes* on organic fresh lettuce. *Int J Food Microbiol* **145**:287–292.
- Inatsu Y, Kitagawa T, Bari ML, Nei D, Juneja V, Kawamoto S.** 2010. Effectiveness of acidified sodium chlorite and other sanitizers to control *Escherichia coli* O157:H7 on tomato surfaces. *Foodborne Pathog Dis* **7**:629–635.
- Behrsing J, Winkler S, Franz P, Premier R.** 2000. Efficacy of chlorine for inactivation of *Escherichia coli* on vegetables. *Postharvest Biol Technol* **19**:187–192.
- Neal JA, Marquez-Gonzalez M, Cabrera-Diaz E, Lucia LM, O'Bryan CA, Crandall PG, Ricke SC, Castillo A.** 2012. Comparison of multiple chemical sanitizers for reducing *Salmonella* and *Escherichia coli* O157:H7 on spinach (*Spinacia oleracea*) leaves. *Food Res Int* **45**:1123–1128.
- López-Gálvez F, Allende A, Selma M V., Gil MI.** 2009. Prevention of *Escherichia coli* cross-contamination by different commercial sanitizers during washing of fresh-cut lettuce. *Int J Food Microbiol* **133**:167–171

12. Lee S-Y, Costello M, Kang D-H. 2004. Efficacy of chlorine dioxide gas as a sanitizer of lettuce leaves. *J Food Prot* **67**:1371–1376.
13. Mahmoud BSM, Bhagat AR, Linton RH. 2007. Inactivation kinetics of inoculated *Escherichia coli* O157:H7, *Listeria monocytogenes* and *Salmonella enterica* on strawberries by chlorine dioxide gas. *Food Microbiol* **24**:736–744.
14. Sy KV, Murray MB, Harrison MD, Beuchat LR. 2005. Evaluation of gaseous chlorine dioxide as a sanitizer for killing *Salmonella*, *Escherichia coli* O157:H7, *Listeria monocytogenes*, and yeasts and molds on fresh and fresh-cut produce. *J Food Prot* **68**:1176–1187.
15. Keskinen LA, Annous BA. 2011. Efficacy of adding detergents to sanitizer solutions for inactivation of *Escherichia coli* O157:H7 on Romaine lettuce. *Int J Food Microbiol* **147**:157–161.
16. Al-Nabusi, A.A., Osaili, T.M., Obaidat, H.M., Shaker, R.R., Awaisheh, S.S., Holley RA. 2014. Inactivation of stressed *Escherichia coli* O157:H7 cells on the surfaces of rocket salad leaves by chlorine and peroxyacetic acid. *J Food Prot* **77**:32–9.
17. Zhang C, Lu Z, Li Y, Shang Y, Zhang G, Cao W. 2011. Reduction of *Escherichia coli* O157:H7 and *Salmonella enteritidis* on mung bean seeds and sprouts by slightly acidic electrolyzed water. *Food Control* **22**:792–796.
18. Chun HH, Song K Bin. 2013. The combined effects of aqueous chlorine dioxide, fumaric acid, and ultraviolet-C with modified atmosphere packaging enriched in CO<sub>2</sub> for inactivating preexisting microorganisms and *Escherichia coli* O157: H7 and *Salmonella* Typhimurium inoculated on buckwhe. *Postharvest Biol Technol* **86**:118–124.
19. Forghani F, Oh DH. 2013. Hurdle enhancement of slightly acidic electrolyzed water antimicrobial efficacy on Chinese cabbage, lettuce, sesame leaf and spinach using ultrasonication and water wash. *Food Microbiol* **36**:40–45.
20. Inatsu Y, Kitagawa T, Nakamura N, Kawasaki S, Nei D, Bari ML, Kawamoto S. 2013. Effectiveness of stable ozone microbubble containing water on reducing bacteria load on selected leafy vegetables. *Acta Horti* **989**:161–166.
21. Kenney SJ, Beuchat LR. 2002. Comparison of aqueous commercial cleaners for effectiveness in removing *Escherichia coli* O157:H7 and *Salmonella* Muenchen from the surface of apples. *Int J Food Microbiol* **74**:47–55.
22. Neo SY, Lim PY, Phua LK, Khoo GH, Kim SJ, Lee SC, Yuk HG. 2013. Efficacy of chlorine and peroxyacetic acid on reduction of natural microflora, *Escherichia coli* O157: H7, *Listeria monocytogenes* and *Salmonella* spp. on mung bean sprouts. *Food Microbiol* **36**:475–480.
23. Palma-Salgado S, Pearlstein AJ, Luo Y, Park HK, Feng H. 2014. Whole-head washing, prior to cutting, provides sanitization advantages for fresh-cut Iceberg lettuce (*Lactuca sativa* L.). *Int J Food Microbiol* **179**:18–23.
24. Tian JQ, Bae YM, Lee SY. 2013. Survival of foodborne pathogens at different relative humidities and temperatures and the effect of sanitizers on apples with different surface conditions. *Food Microbiol* **35**:21–26.



25. **Keeratipibul S, Phewpan A, Lursinsap C.** 2011. Prediction of coliforms and *Escherichia coli* on tomato fruits and lettuce leaves after sanitizing by using Artificial Neural Networks. *LWT - Food Sci Technol* **44**:130–138.
26. **Issa-Zacharia A, Kamitani Y, Miwa N, Muhimbula H, Iwasaki K.** 2011. Application of slightly acidic electrolyzed water as a potential non-thermal food sanitizer for decontamination of fresh ready-to-eat vegetables and sprouts. *Food Control* **22**:601–607.
27. **Kwon KY, Kang KA, Yoon KS.** 2011. Effects of sodium hypochlorite and acidified sodium chlorite on the morphological, microbiological, and sensory qualities of selected vegetables. *Food Sci Biotechnol* **20**:759–766.
28. **Mahmoud BSM, Vaidya NA, Corvalan CM, Linton RH.** 2008. Inactivation kinetics of inoculated *Escherichia coli* O157:H7, *Listeria monocytogenes* and *Salmonella* Poona on whole cantaloupe by chlorine dioxide gas. *Food Microbiol* **25**:857–865.
29. **Su X, D'Souza DH.** 2012. Reduction of *Salmonella* Typhimurium and *Listeria monocytogenes* on produce by trisodium phosphate. *LWT - Food Sci Technol* **45**:221–225.
30. **Bari ML, Ukuku DO, Kawasaki T, Inatsu Y, Isshiki K, Kawamoto S.** 2005. Combined efficacy of nisin and pediocin with sodium lactate, citric acid, phytic acid, and potassium sorbate and EDTA in reducing the *Listeria monocytogenes* population of inoculated fresh-cut produce. *J Food Prot* **68**:1381–1387.
31. **Xu W, Qu W, Huang K, Guo F, Yang J, Zhao H, Luo Y.** 2007. Antibacterial effect of Grapefruit Seed Extract on food-borne pathogens and its application in the preservation of minimally processed vegetables. *Postharvest Biol Technol* **45**:126–133.
32. **Ijabadeniyi OA, Ngcobo NS.** 2013. Bacterial pathogens isolated from vegetables and application of sanitizers for control of *L. monocytogenes* ATCC 7644 in cucumber. *J Food, Agric Environ* **11**:15–19.
33. **Li Y, Wu C.** 2013. Enhanced inactivation of *Salmonella* Typhimurium from blueberries by combinations of sodium dodecyl sulfate with organic acids or hydrogen peroxide. *Food Res Int* **54**:1553–1559.
34. **Sengun IY, Karapinar M.** 2005. Effectiveness of household natural sanitizers in the elimination of *Salmonella* typhimurium on rocket (*Eruca sativa* Miller) and spring onion (*Allium cepa* L.). *Int J Food Microbiol* **98**:319–323.
35. **Chang AS, Schneider KR.** 2012. Evaluation of overhead spray-applied sanitizers for the reduction of *Salmonella* on tomato surfaces. *J Food Sci* **77**:65–69.
36. **Trinetta V, Morgan MT, Linton RH.** 2010. Use of high-concentration-short-time chlorine dioxide gas treatments for the inactivation of *Salmonella enterica* spp. inoculated onto Roma tomatoes. *Food Microbiol* **27**:1009–1015.
37. **Yuk H-G, Bartz J a, Schneider KR.** 2005. Effectiveness of Individual or Combined Sanitizer Treatments for Inactivating *Salmonella* spp. on Smooth Surface, Stem Scar, and Wounds of Tomatoes. *J Food Sci* **70**:M409–M414.

- 38. Kenney SJ, Beuchat LR.** 2002. Survival of *Escherichia coli* O157:H7 and *Salmonella* Muenchen on apples as affected by application of commercial fruit waxes. *Int J Food Microbiol* **77**:223–231.
- 39. Ukuku DO.** 2004. Effect of hydrogen peroxide treatment on microbial quality and appearance of whole and fresh-cut melons contaminated with *Salmonella* spp. *Int J Food Microbiol* **95**:137–146.
- 40. Ge C, Bohrerova Z, Lee J.** 2013. Inactivation of internalized *Salmonella* Typhimurium in lettuce and green onion using ultraviolet C irradiation and chemical sanitizers. *J Appl Microbiol* **114**:1415–1424.
